# Supplementary material for: Electron transfer in complexes of BIIcations with organic π-acceptors: a combined experimental and quantum-chemical study
Source: Royal Society of Chemistry journal article supplement (doi:10.1039/c9dt03151k), 2019-01-01
Supplement: c9dt03151k1.pdf [file c9dt03151k1.pdf]

## Supporting Information

### Electron transfer in complexes of B<sup>II</sup> cations with organic $\pi$ -acceptors: A combined experimental and quantum-chemical study

Daniel Vogler, Nina Wolf, Elisabeth Kaifer, Hans-Jörg Himmel

#### Content

| Entry | Description                                                                                               | Page |
|-------|-----------------------------------------------------------------------------------------------------------|------|
| 1     | Analytical data                                                                                           | 2    |
| 2     | Decomposition of <b>6</b> (OTf)                                                                           | 11   |
| 3     | Analytical data for reaction of compound <b>2</b> with 2,2'-dichlorobenzil ( <b>S</b> <sub>5</sub> )      | 13   |
| 4     | Analytical data for reaction of compound <b>2</b> with benzil ( <b>S</b> <sub>6</sub> )                   | 14   |
| 5     | Analytical data for reaction of compound <b>2</b> with 1,2-acenaphthylene-dione ( <b>S</b> <sub>7</sub> ) | 16   |
| 6     | Separation of the catechol (shown exemplary for <b>3</b> (OTf))                                           | 18   |
| 2     | Results of the quantum-chemical calculations                                                              | 19   |

## 1 Analytical data

### 1a) Analytical data for compound **4**(OTf)

$^1\text{H}$  NMR spectrum (400 MHz,  $\text{CH}_2\text{Cl}_2$ ) for **4**(OTf). The asterisk denotes a solvent signal.

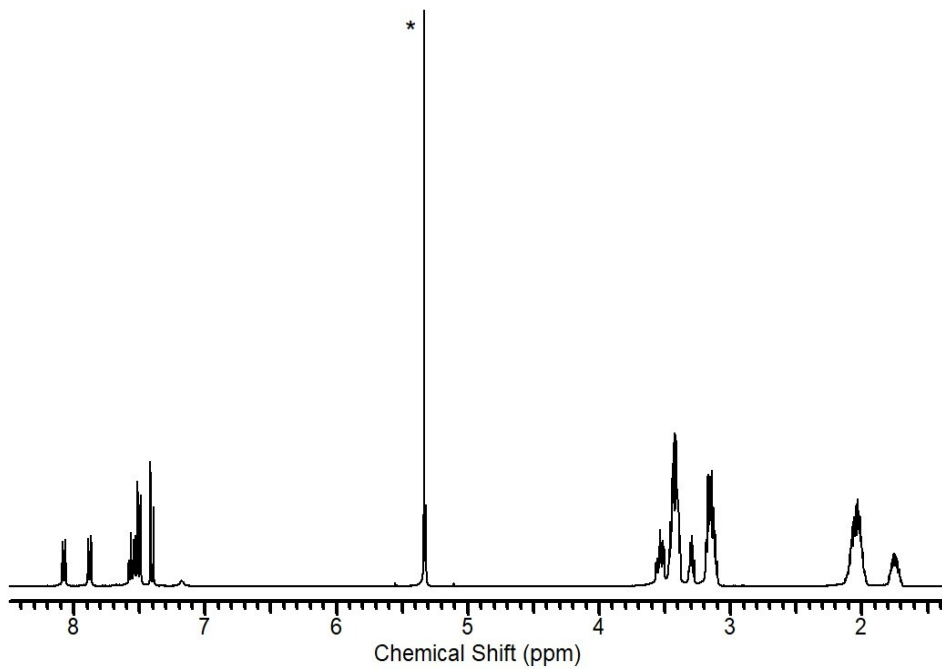

$^{11}\text{B}$  NMR spectrum (128 MHz,  $\text{CD}_2\text{Cl}_2$ ) for **4**(OTf).

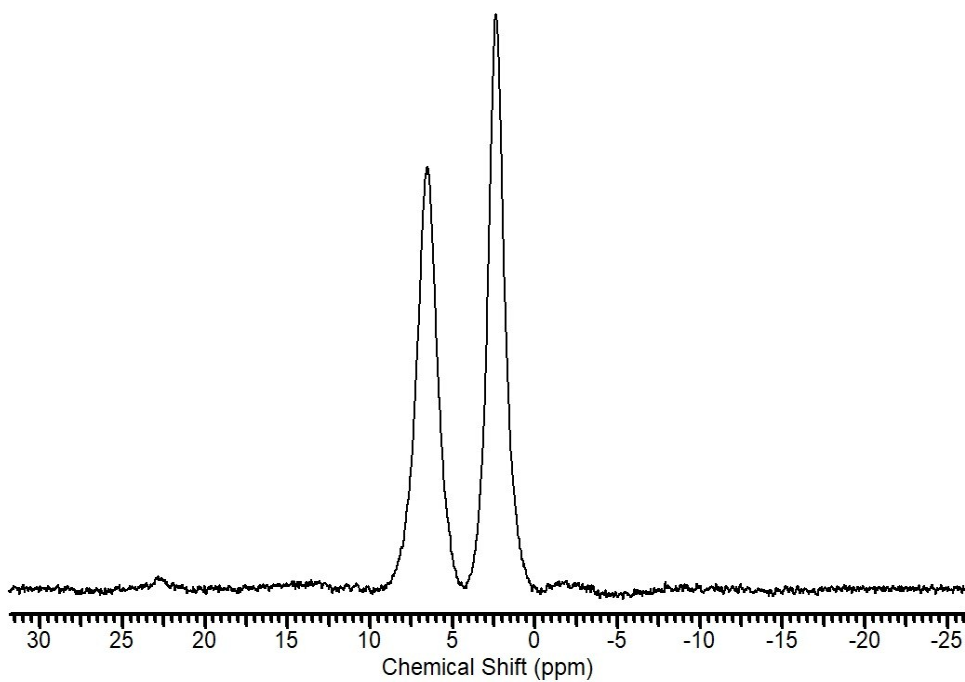

$^{19}\text{F}$  NMR spectrum (376 MHz,  $\text{CD}_2\text{Cl}_2$ ) for **4**(OTf).

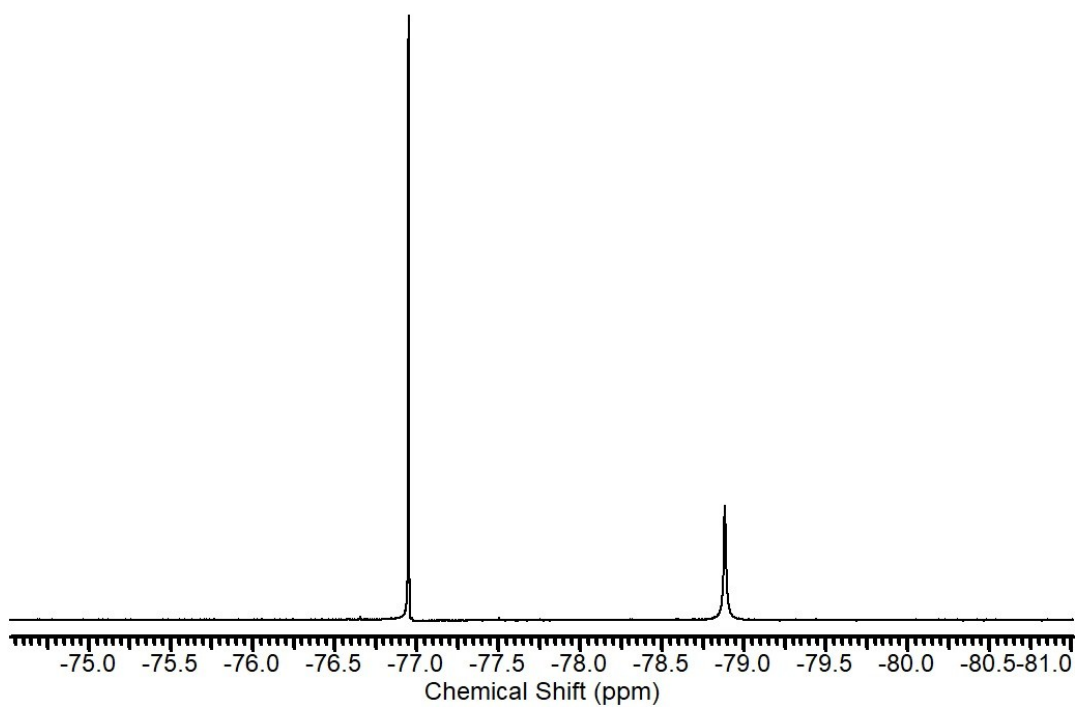

$^{13}\text{C}$  NMR spectrum (100 MHz,  $\text{CD}_2\text{Cl}_2$ ) for **4**(OTf). The asterisk denotes a solvent signal.

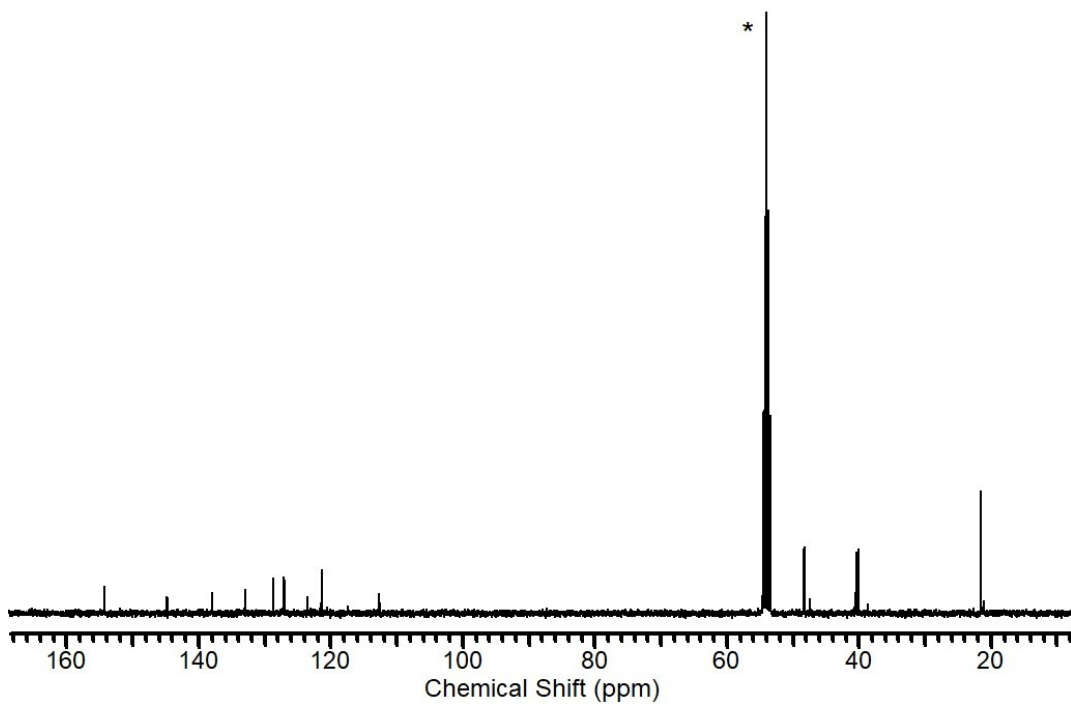

IR spectrum (powder) of **4**(OTf).

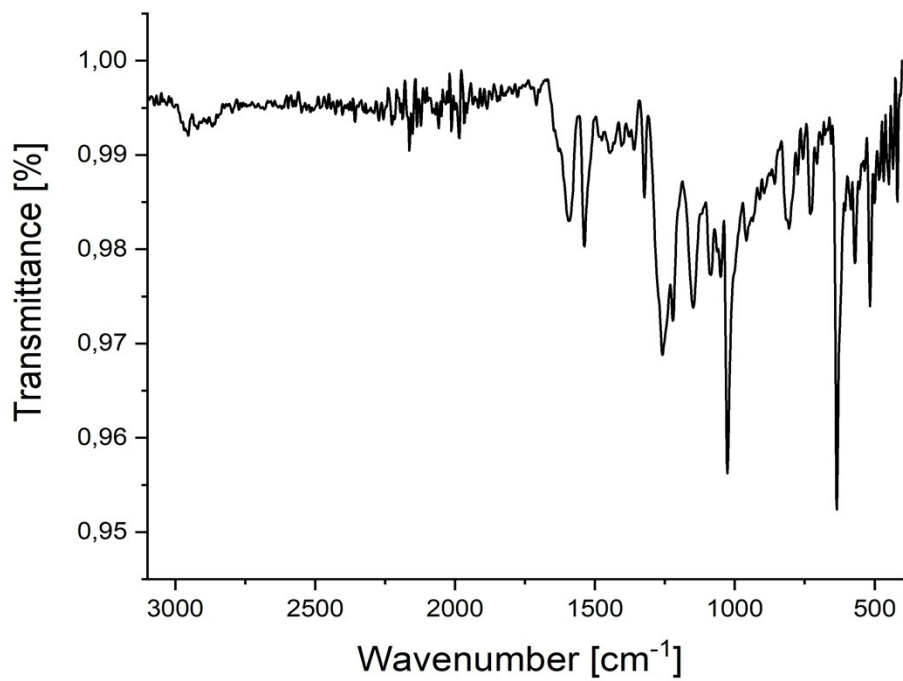

UV-Vis spectra (CH<sub>2</sub>Cl<sub>2</sub>) for **4**(OTf) (red) and 1,2-naphthalene-dione (**S**<sub>3</sub>, black).

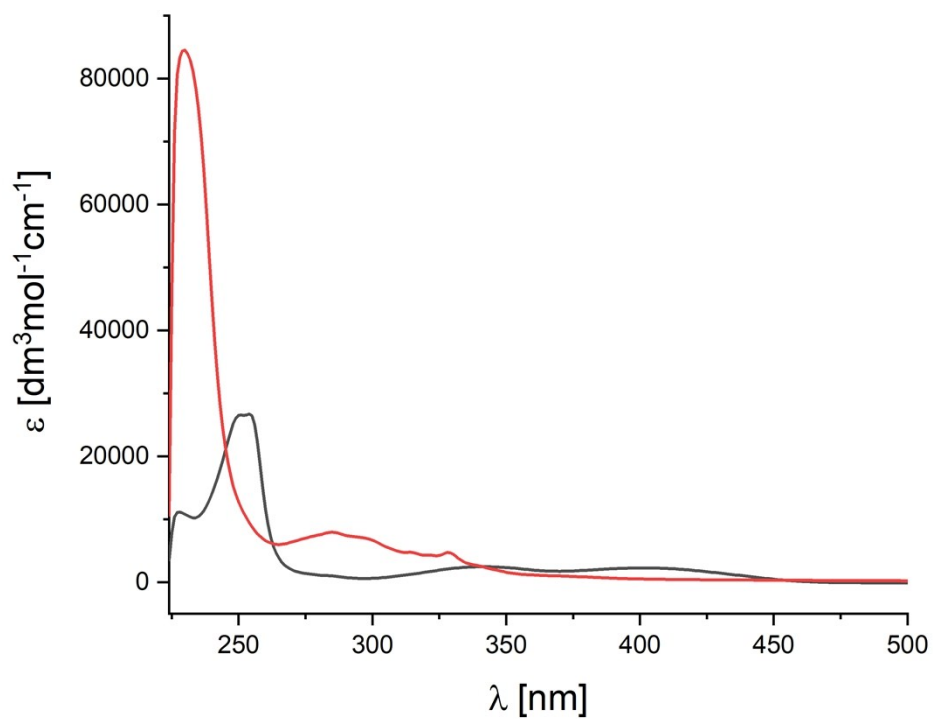

1b) Analytical data for compound **5**(OTf)

$^1\text{H}$  NMR spectrum (400 MHz,  $\text{CH}_2\text{Cl}_2$ ) for **5**(OTf). The asterisk denotes a solvent signal.

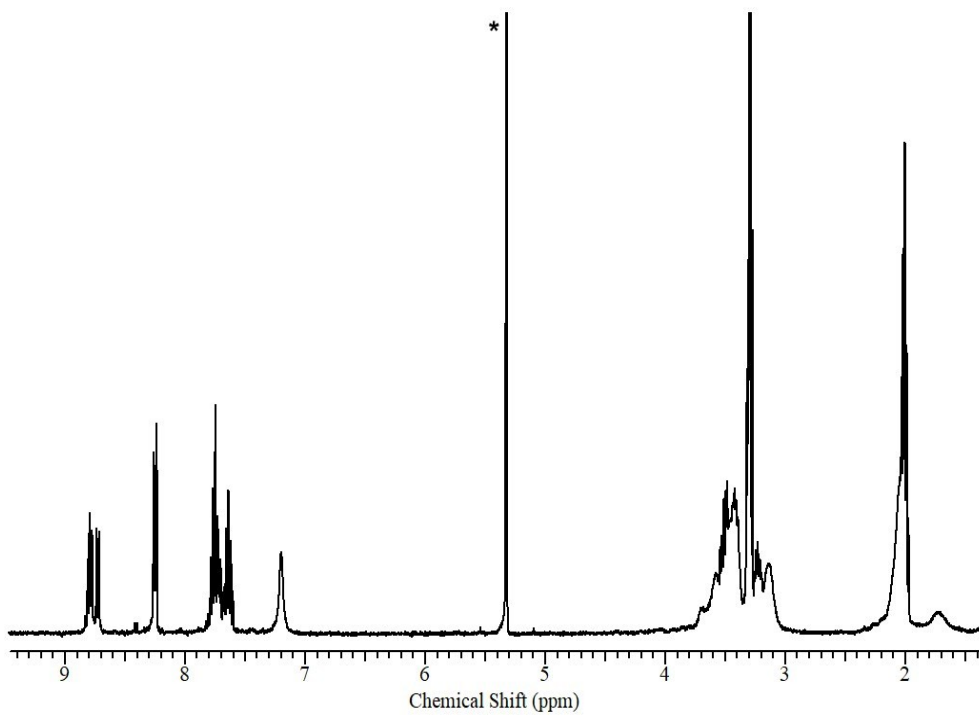

$^{11}\text{B}$  NMR spectrum (128 MHz,  $\text{CD}_2\text{Cl}_2$ ) for **5**(OTf).

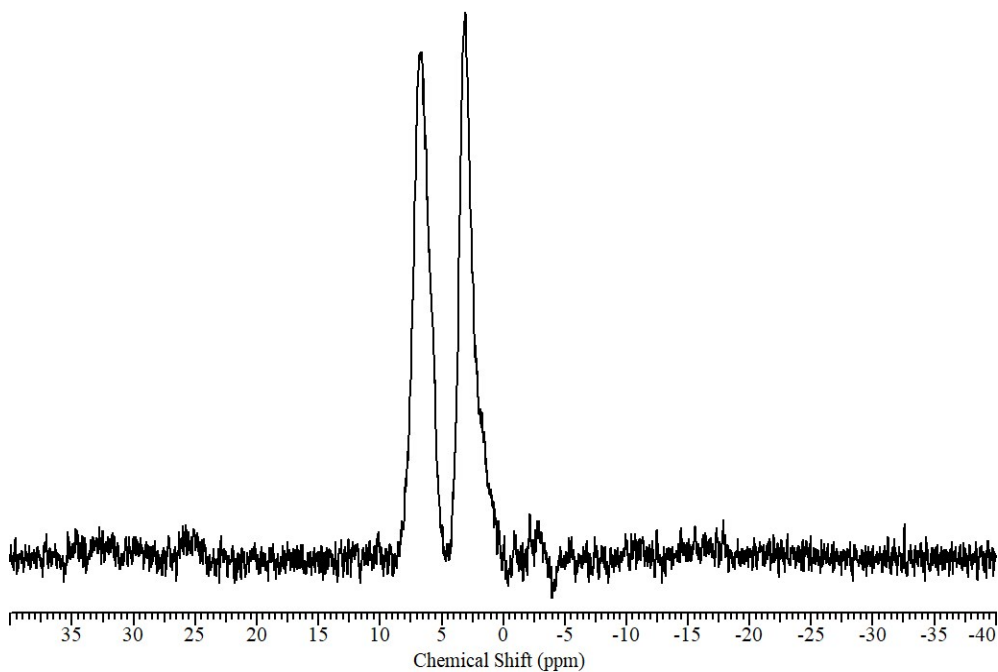

$^{19}\text{F}$  NMR spectrum (376 MHz,  $\text{CD}_2\text{Cl}_2$ ) for **5**(OTf).

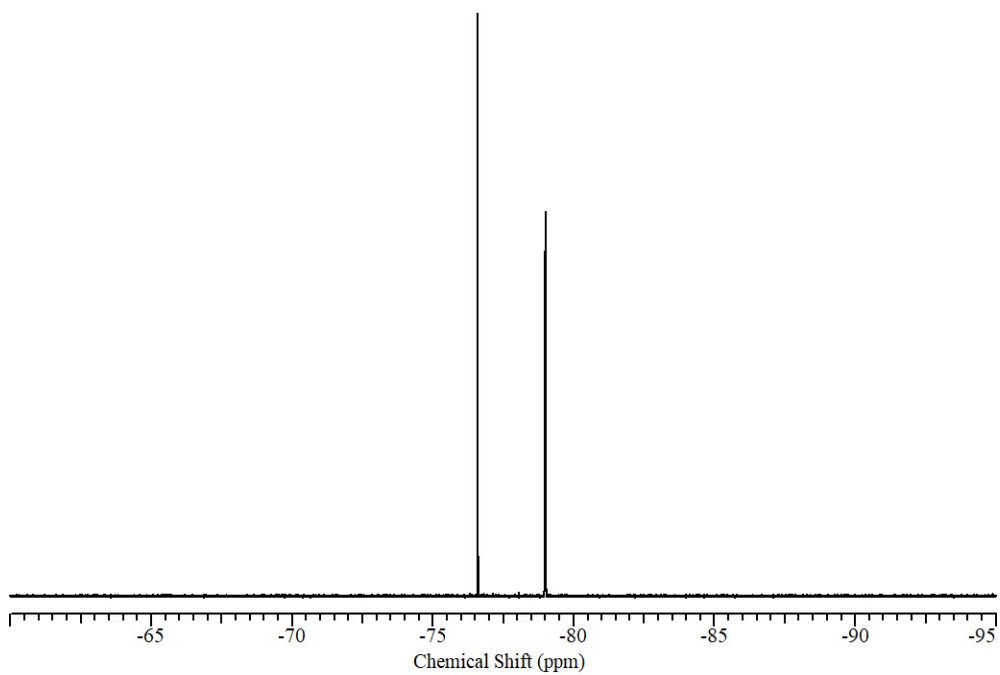

$^{13}\text{C}$  NMR spectrum (100 MHz,  $\text{CD}_2\text{Cl}_2$ ) for **5**(OTf). The asterisk denotes a solvent signal.

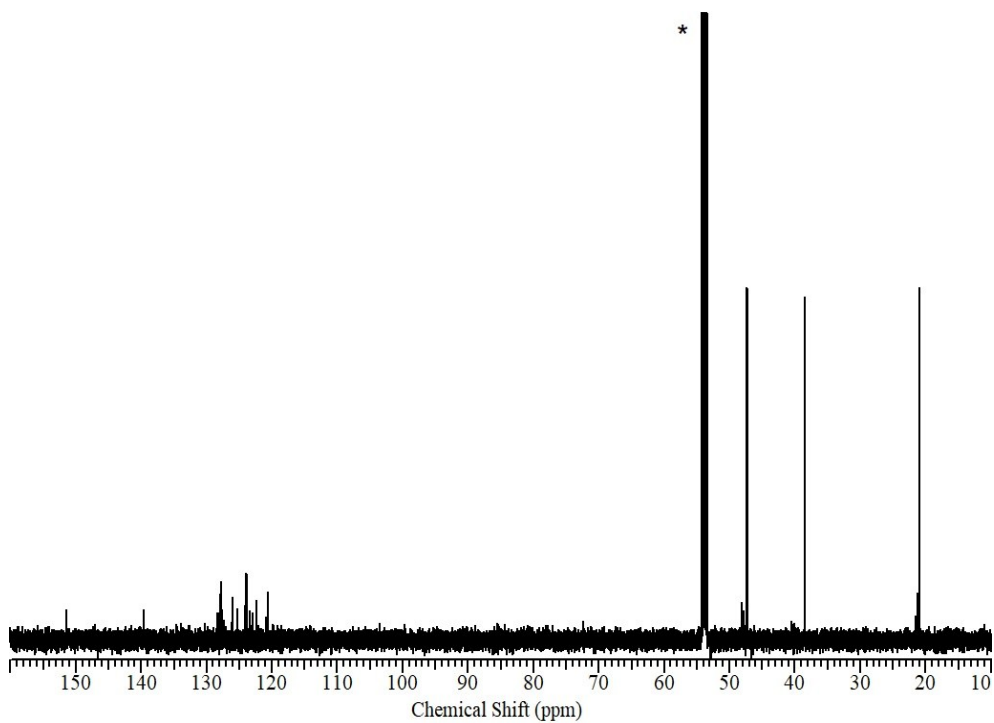

IR spectrum (KBr disk) of **5**(OTf).

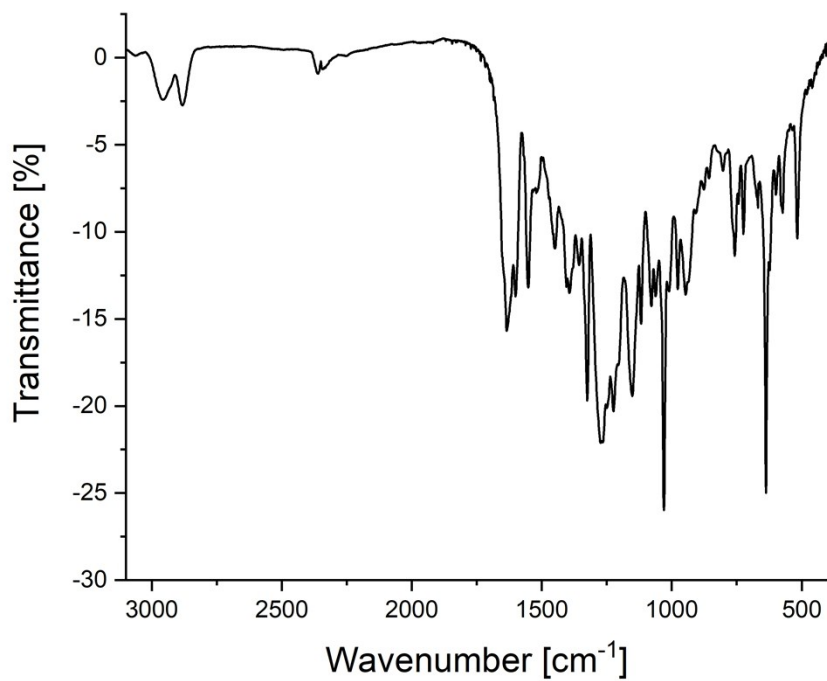

UV-Vis spectra (CH<sub>2</sub>Cl<sub>2</sub>) for **5**(OTf) (red) and 9,10-phenanthrene-dione (**S**<sub>4</sub>, black).

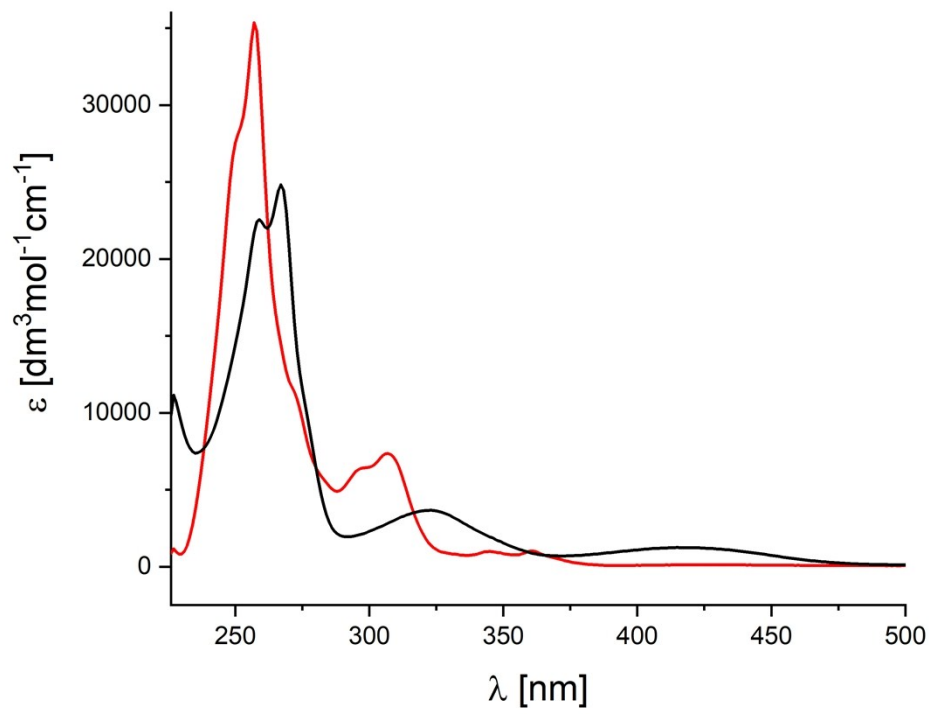



1c) Analytical data for compound **6**(OTf)

$^1\text{H}$  NMR spectrum (400 MHz,  $\text{CH}_2\text{Cl}_2$ ) for **6**(OTf). The asterisk denotes a solvent signal.

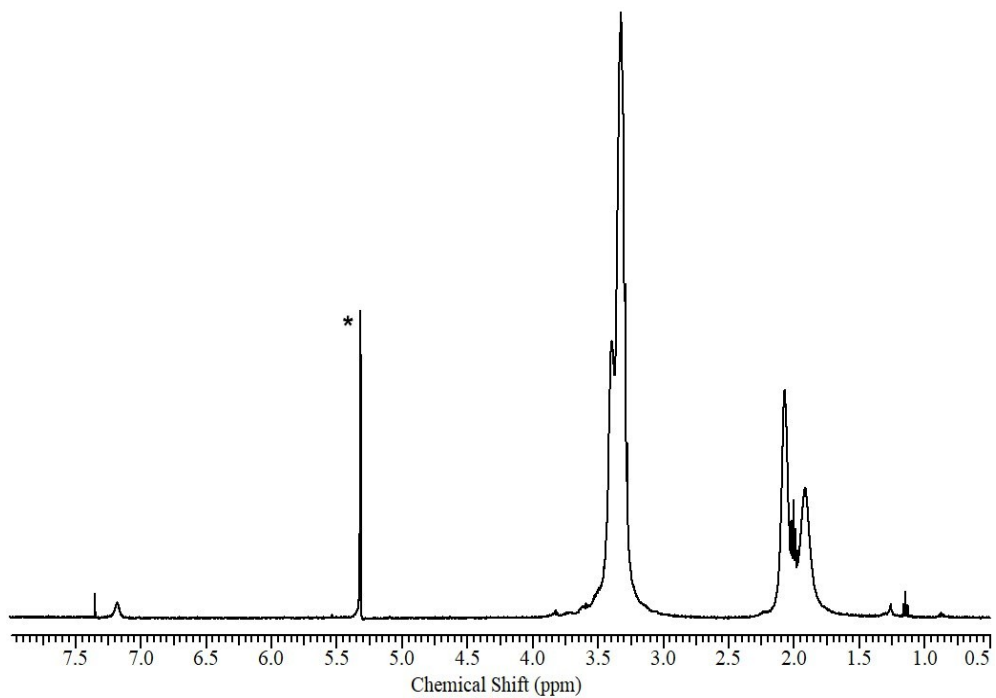

$^{11}\text{B}$  NMR spectrum (128 MHz,  $\text{CD}_2\text{Cl}_2$ ) for **6**(OTf).

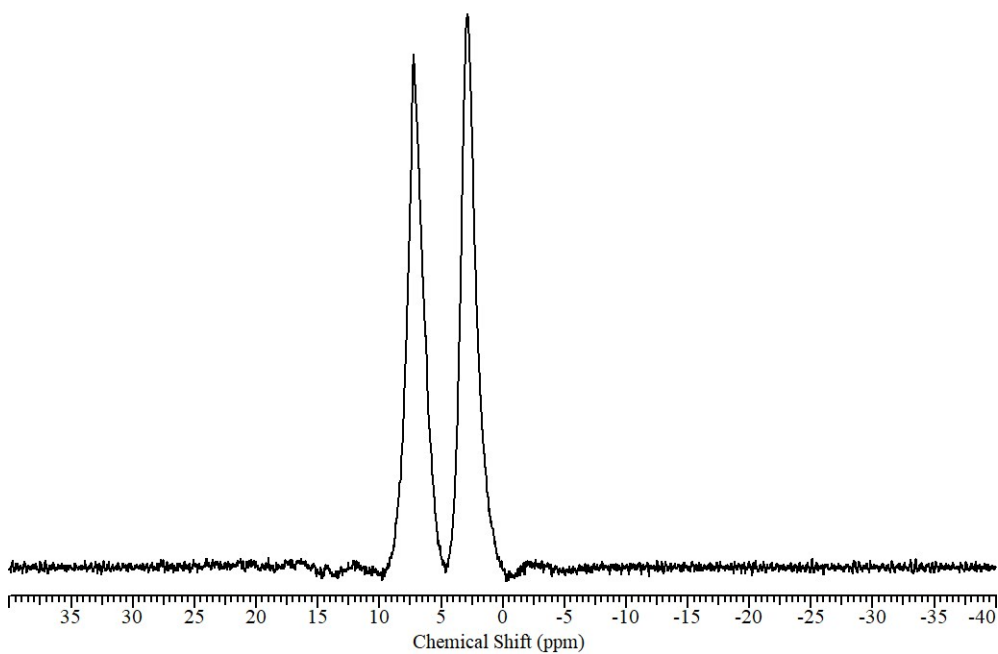

$^{19}\text{F}$  NMR spectrum (376 MHz,  $\text{CD}_2\text{Cl}_2$ ) for **6**(OTf).

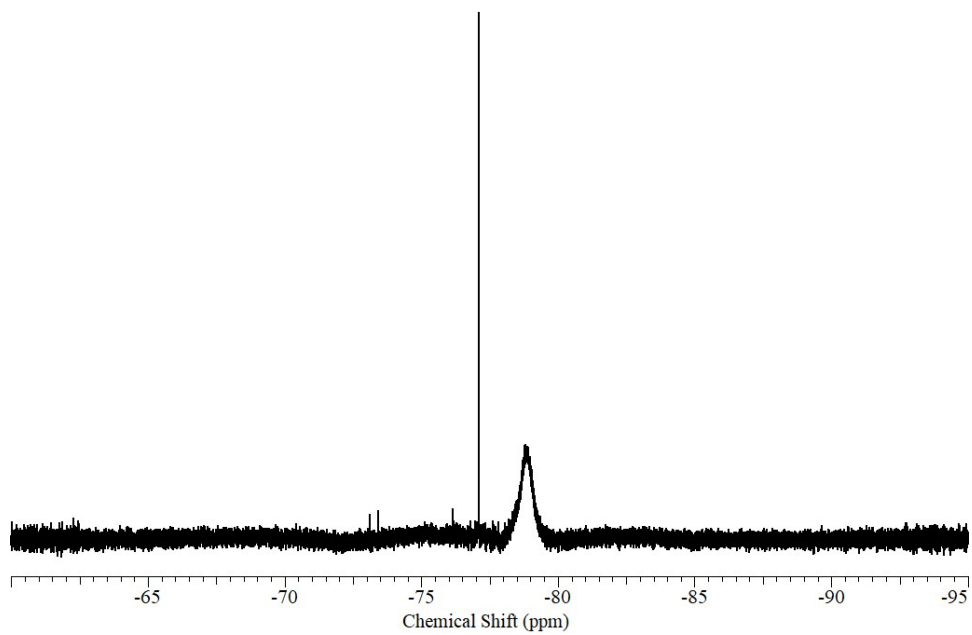

$^{13}\text{C}$  NMR spectrum (100 MHz,  $\text{CD}_2\text{Cl}_2$ ) for **6**(OTf).

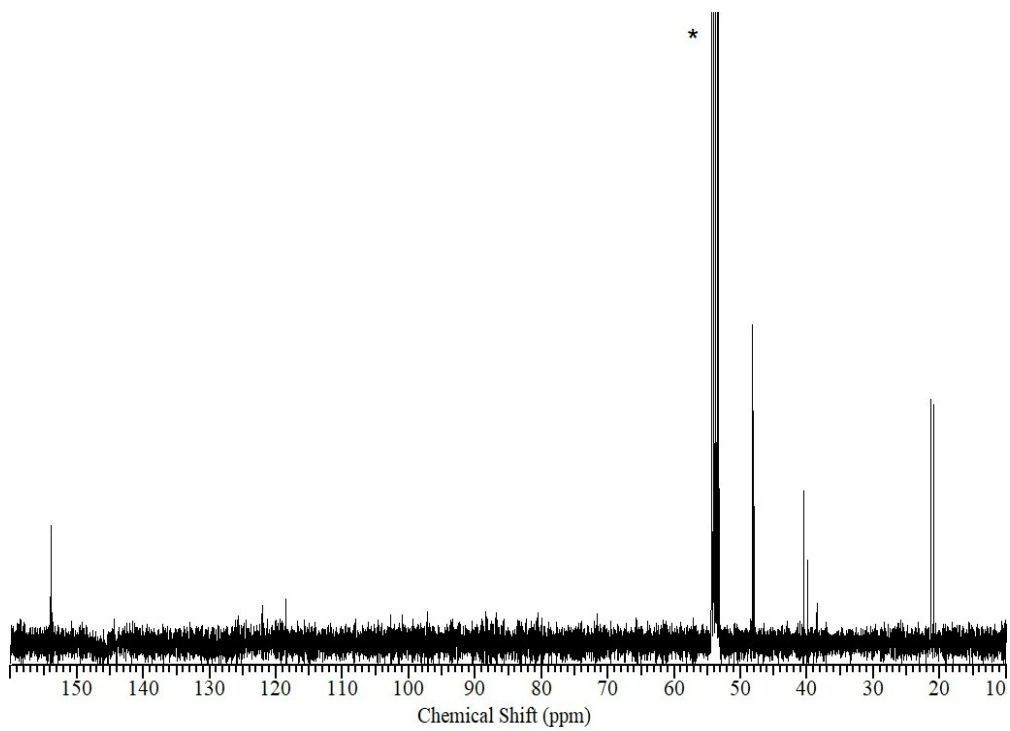

IR spectrum (KBr disk) of **6**(OTf).

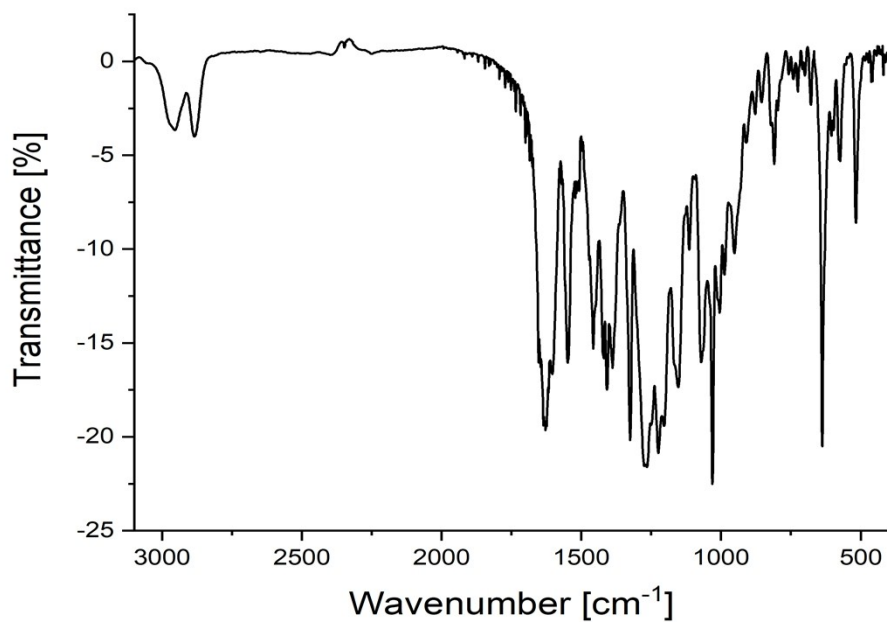

UV/Vis spectra ( $\text{CH}_2\text{Cl}_2$ ) for **6**(OTf) (red) and 3,4,5,6-tetrachloro-benzoquinone (**S**<sub>2</sub>, black).

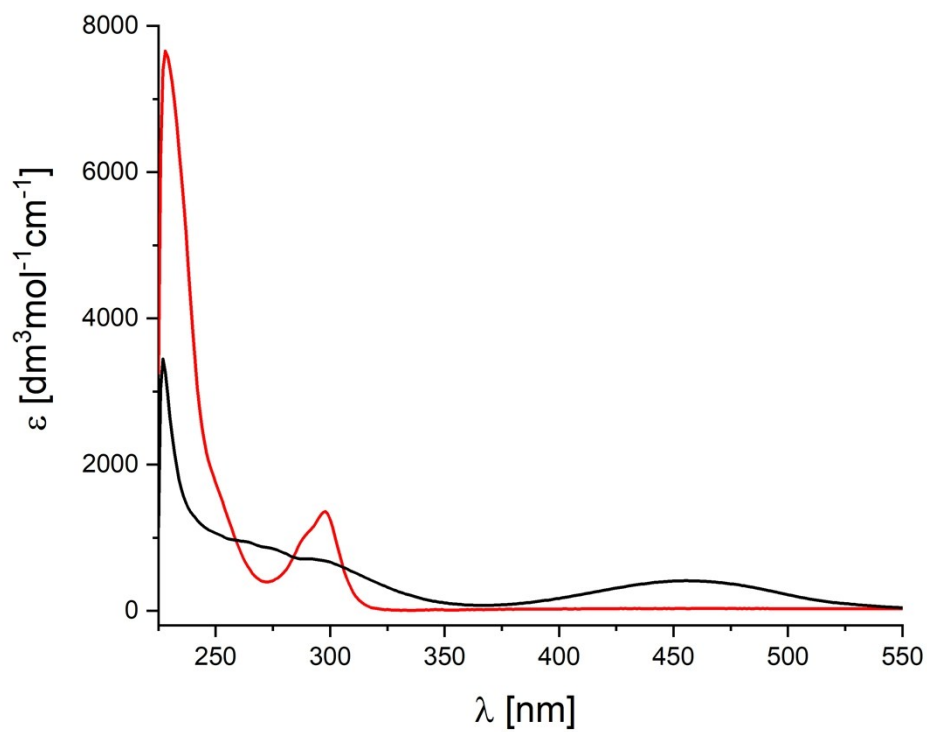

## 2. Decomposition of **6**(OTf)

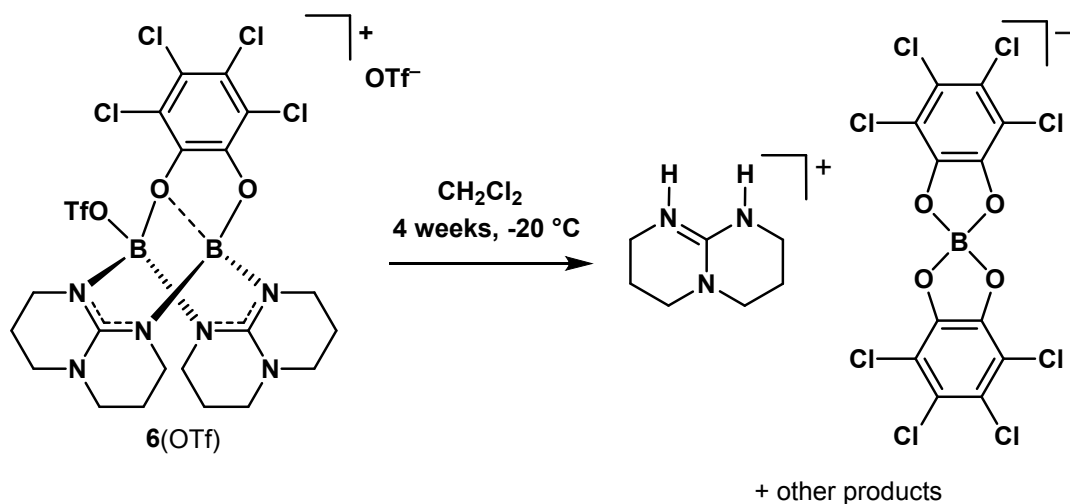

$^{11}\text{B}$  NMR spectra (128 MHz,  $\text{CD}_2\text{Cl}_2$ ) of **6**(OTf) immediately after preparation of a solution in  $\text{CH}_2\text{D}_2$  (black), after storage under argon atmosphere at  $-20^\circ\text{C}$  for four weeks (red) and of the crystals of the decomposition product (blue). The asterisk marks the signal of the boron atom of the crystallized structure at  $\delta = 14.1$  ppm.<sup>[1]</sup>

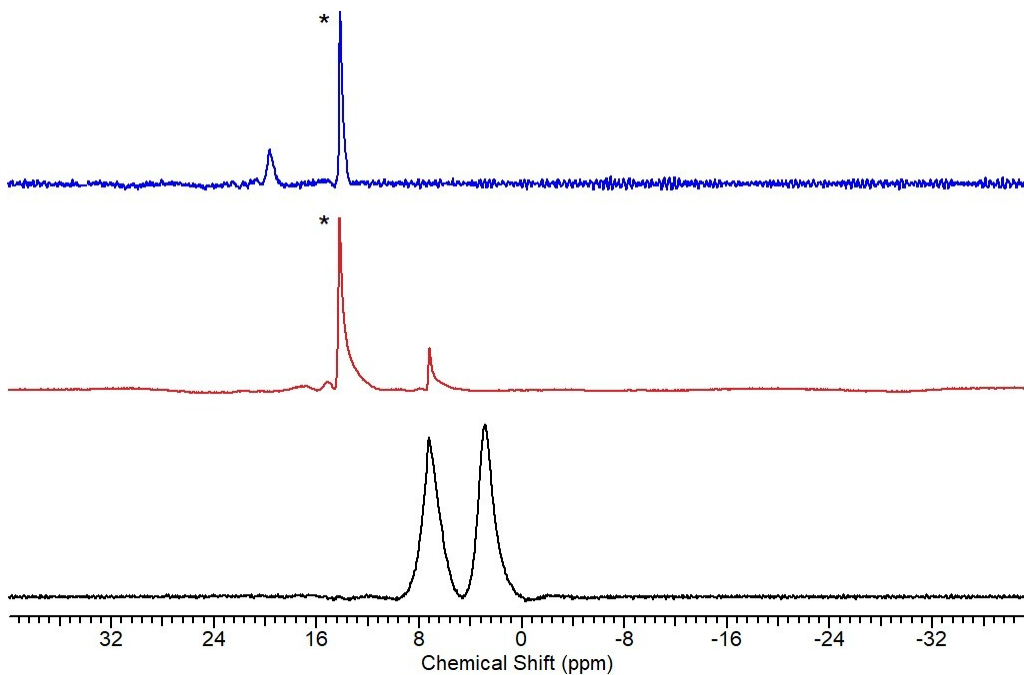

[1] C. Feuvrie, I. Ledoux, J. Zyss, H. Le Bozec, O. Maury, *C. R. Chimie*, 2005, **8**, 1243-1248.

Illustration of the structure of one cation-anion pair from the crystals formed during the decomposition of **6**(OTf) in dichloromethane solution.

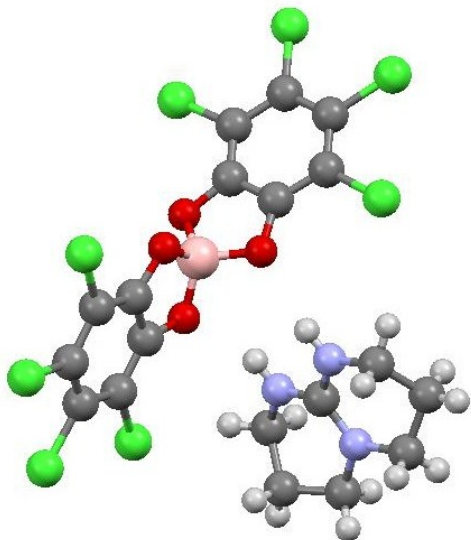

Crystal data for  $C_{20}H_{16}BCl_{10}N_3O_4$ ,  $M_r = 727.67$ ,  $0.60 \times 0.45 \times 0.20$ , monoklin, space group  $P 21/n$ ,  $a = 15.239(3)$ ,  $b = 11.928(2)$ ,  $c = 16.177(3)$  Å,  $\alpha = 90.00^\circ$ ,  $\beta = 105.52(3)^\circ$ ,  $\gamma = 90.00^\circ$ ,  $V = 2833.2(11)$  Å<sup>3</sup>,  $Z = 4$ ,  $\rho_{\text{calc}} = 1.706$  Mg·m<sup>3</sup>, Mo- $K_\alpha$  radiation ( $\lambda = 0.71073$  Å),  $T = 120$  K,  $\theta_{\text{range}} = 2.145 - 30.074^\circ$ . Reflections collected 8281, independent reflections 6272,  $R_{\text{int}} = 0.0483$ . Final  $R$  indices [ $I > 2\sigma(I)$ ]:  $R = 0.0570$ ,  $wR = 0.1017$ .

### 3. Analytical data for reaction of compound **2** with 2,2'-dichlorobenzil (**S<sub>5</sub>**)

<sup>11</sup>B NMR spectra (128 MHz, CD<sub>2</sub>Cl<sub>2</sub>) for compound **2** (black) and the product of the reaction of **2** with **S<sub>5</sub>** (red), denoted **7(OTf)**

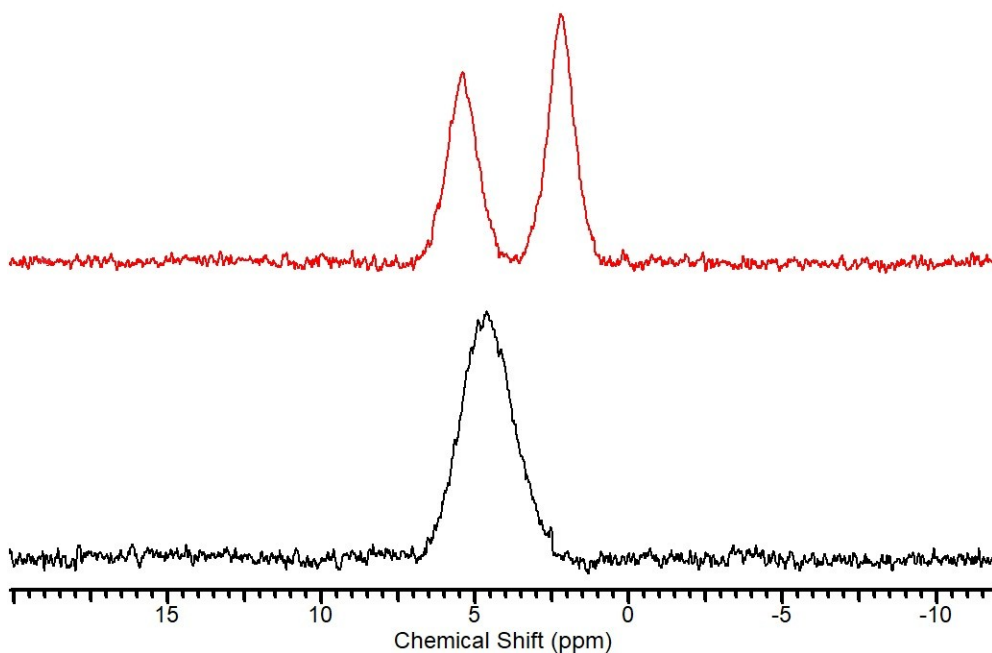

<sup>19</sup>F NMR spectra (376 MHz, CD<sub>2</sub>Cl<sub>2</sub>) for compound **2** (black) and the product of the reaction of **2** with **S<sub>5</sub>** (red), denoted **7(OTf)**

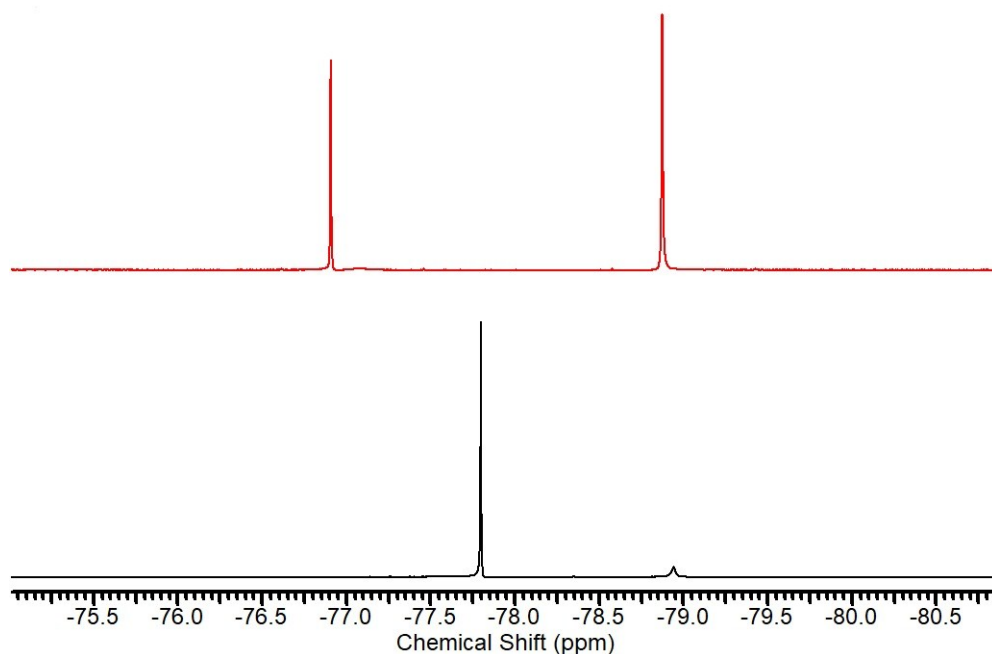

#### 4. Analytical data for reaction of compound **2** with benzil (**S<sub>6</sub>**)

<sup>11</sup>B NMR spectra (128 MHz, CD<sub>2</sub>Cl<sub>2</sub>) for compound **2** (black) and the product of the reaction of **2** with **S<sub>6</sub>** (red).

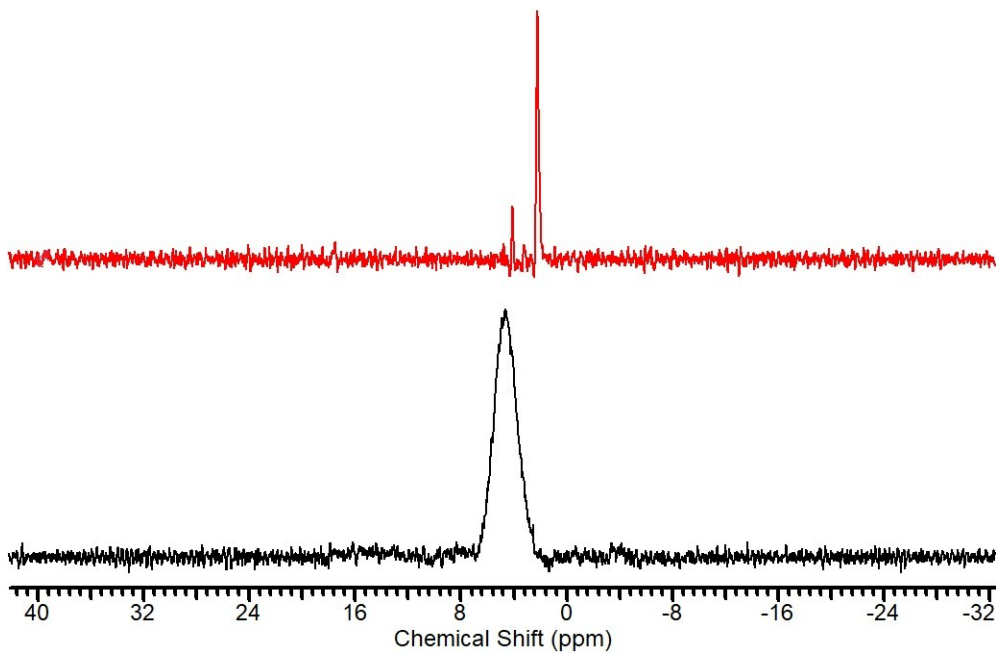

<sup>19</sup>F NMR spectra (376 MHz, CD<sub>2</sub>Cl<sub>2</sub>) for compound **2** (black) and the product of the reaction of **2** with **S<sub>6</sub>** (red).

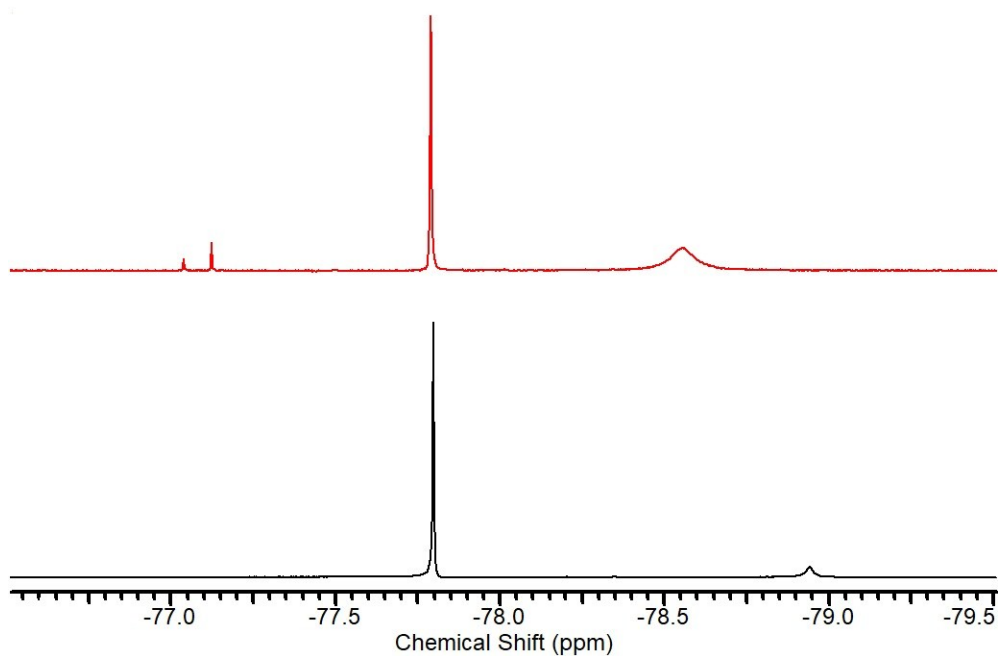

Illustration of the structure of one cation-anion pair in the crystals precipitating from the reaction mixture containing compound **2** and **S<sub>6</sub>**.

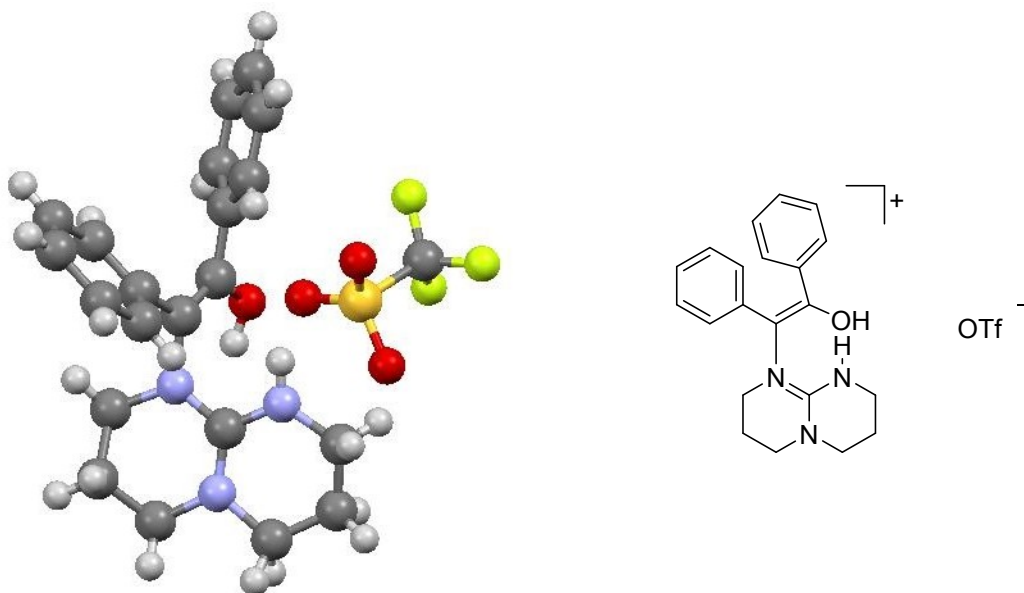

Crystal data for  $C_{22}H_{24}F_3N_3O_4S$ ,  $M_r = 483.50$ ,  $0.80 \times 0.70 \times 0.60$  mm, monoclinic, space group  $P 2_1/n$ ,  $a = 22.713(5)$ ,  $b = 9.776(2)$ ,  $c = 23.112(5)$  Å,  $\alpha = 90.00^\circ$ ,  $\beta = 119.37^\circ$ ,  $\gamma = 90.00^\circ$ ,  $V = 4472.2(19)$  Å<sup>3</sup>,  $Z = 8$ ,  $\rho_{\text{calcd}} = 1.436$  Mg·m<sup>-3</sup>, Mo- $K_\alpha$  radiation ( $\lambda = 0.71073$  Å),  $T = 120$  K,  $\theta_{\text{range}} = 1.761 - 30.099^\circ$ . Reflections collected 13102, independent reflections 8759,  $R_{\text{int}} = 0.0604$ . Final  $R$  indices [ $I > 2\sigma(I)$ ]:  $R = 0.0935$ ,  $wR = 0.1528$ .



5. Analytical data for reaction of compound **2** with 1,2-acenaphthylene-dione (**S<sub>7</sub>**)

<sup>19</sup>F NMR spectra (376 MHz, CD<sub>2</sub>Cl<sub>2</sub>) for compound **2** (black) and the product of the reaction between **2** and **S<sub>7</sub>** (red).

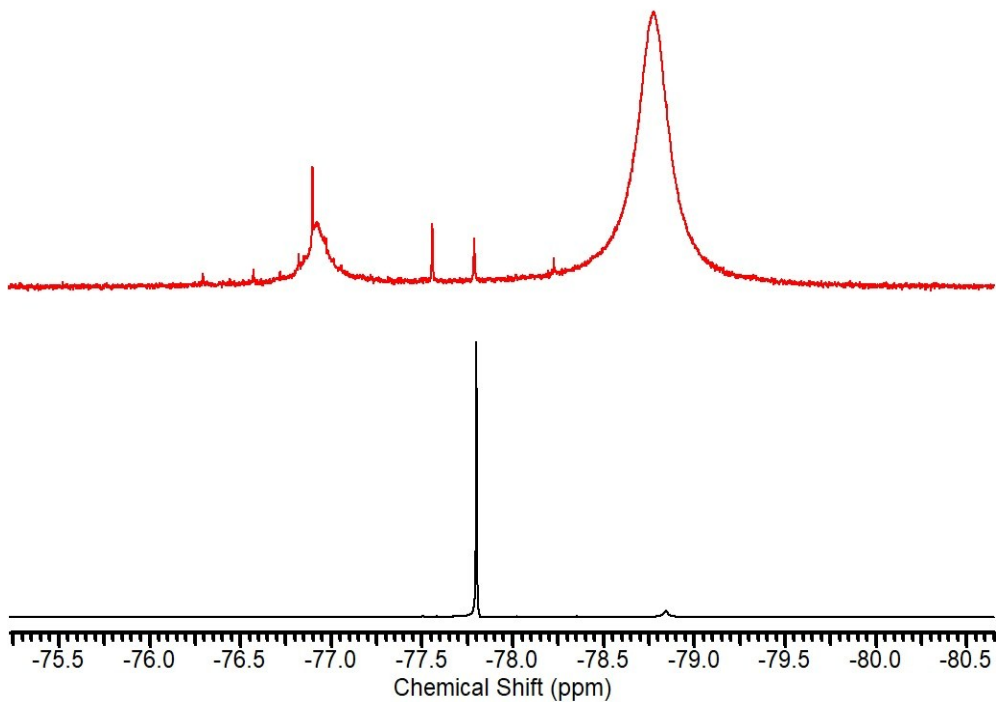

Comparison between the  $^{11}\text{B}$  NMR spectra (128 MHz,  $\text{CD}_2\text{Cl}_2$ ) for compound **2** (black), **3**(OTf) (red), **4**(OTf) (blue), **5**(OTf) (green), **6**(OTf) (magenta) and the product of the reaction between **2** and  $\text{S}_5$  (brown), denoted **7**(OTf).

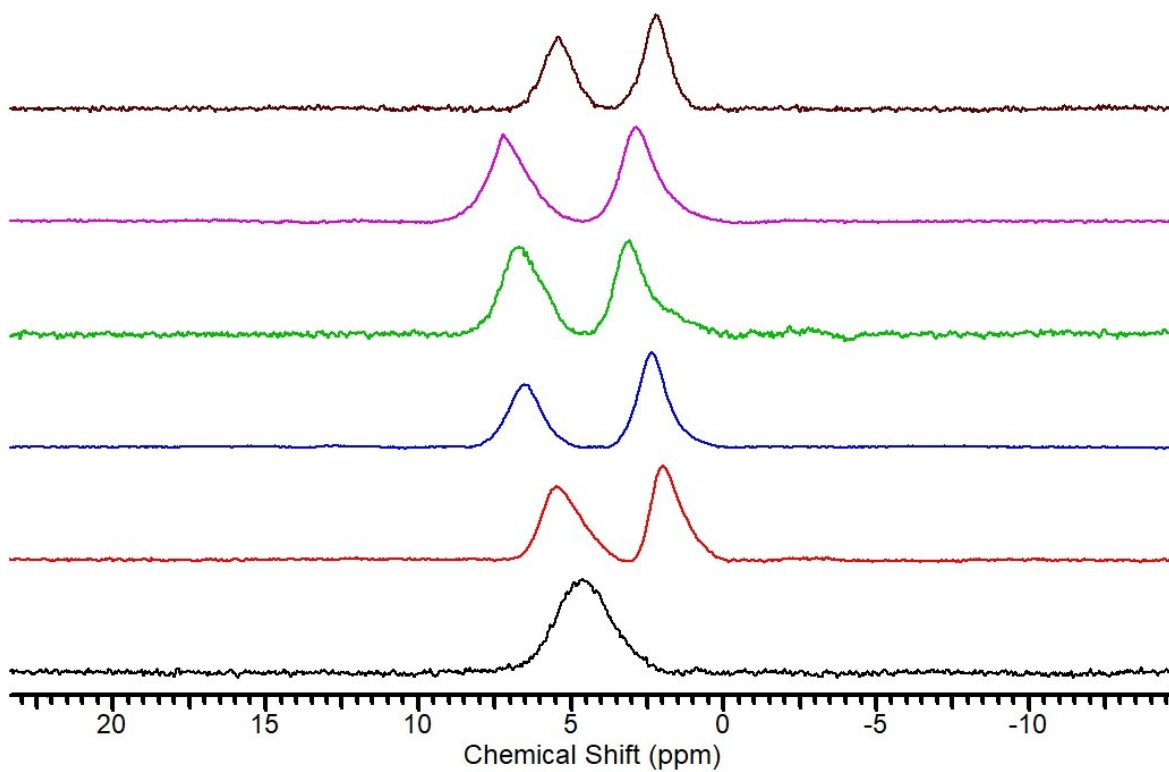

## 6. Separation of the catechol (shown exemplary for **3**(OTf))

Reaction of **3**(OTf) with MeOH.

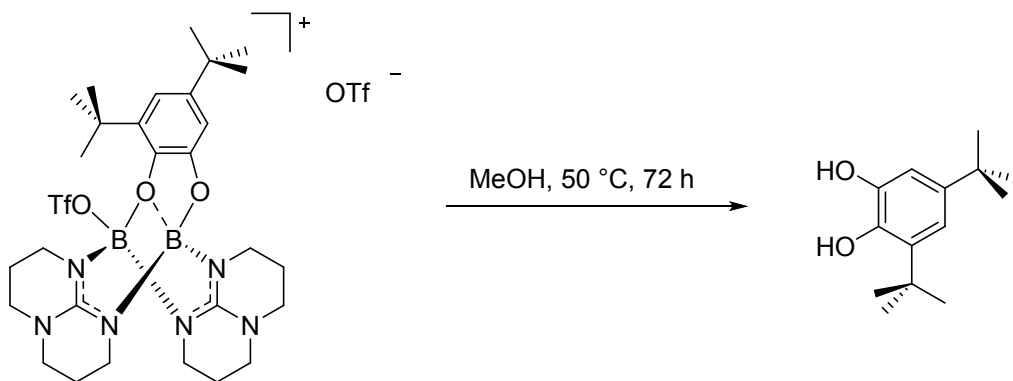

$^1\text{H}$  NMR spectra (128 MHz,  $\text{CD}_2\text{Cl}_2$ ) of **3**(OTf) after synthesis (black), after reaction with MeOH (red) and of the 3,5-di-*tert*-butyl-*o*-catechol (blue). The asterisk denotes a solvent signal.

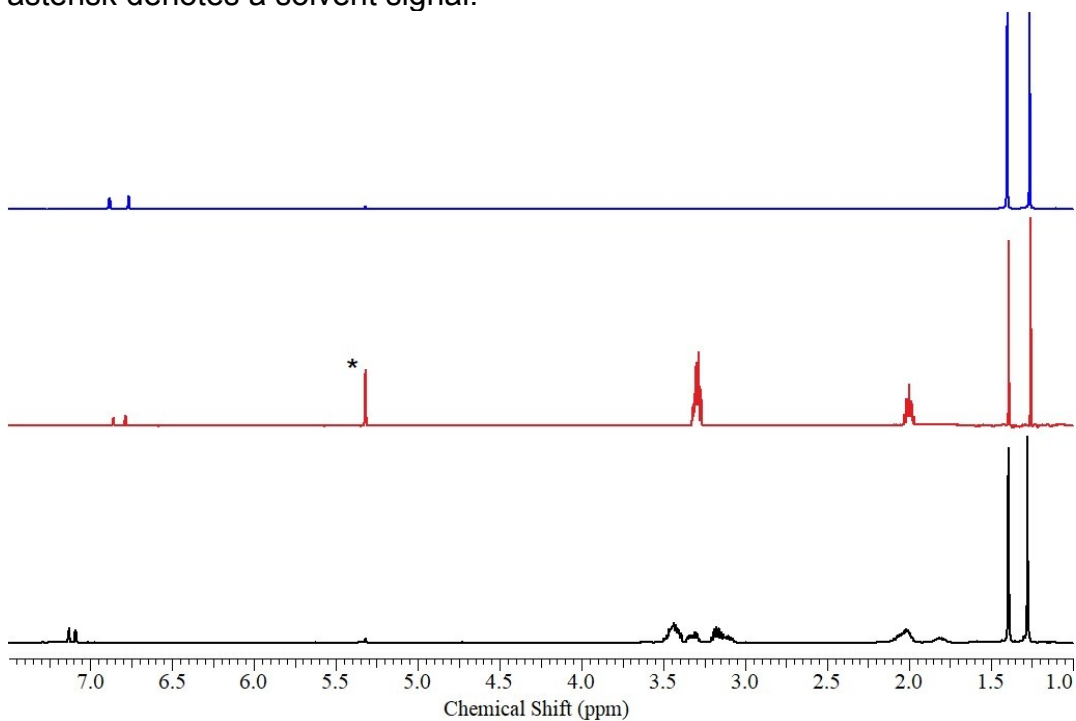

## 7. Results of the quantum-chemical calculations

Illustration of the global-energy minima for **Red(S<sub>1</sub>) – Red(S<sub>4</sub>)** calculated with B3LYP/def2-TZVP.

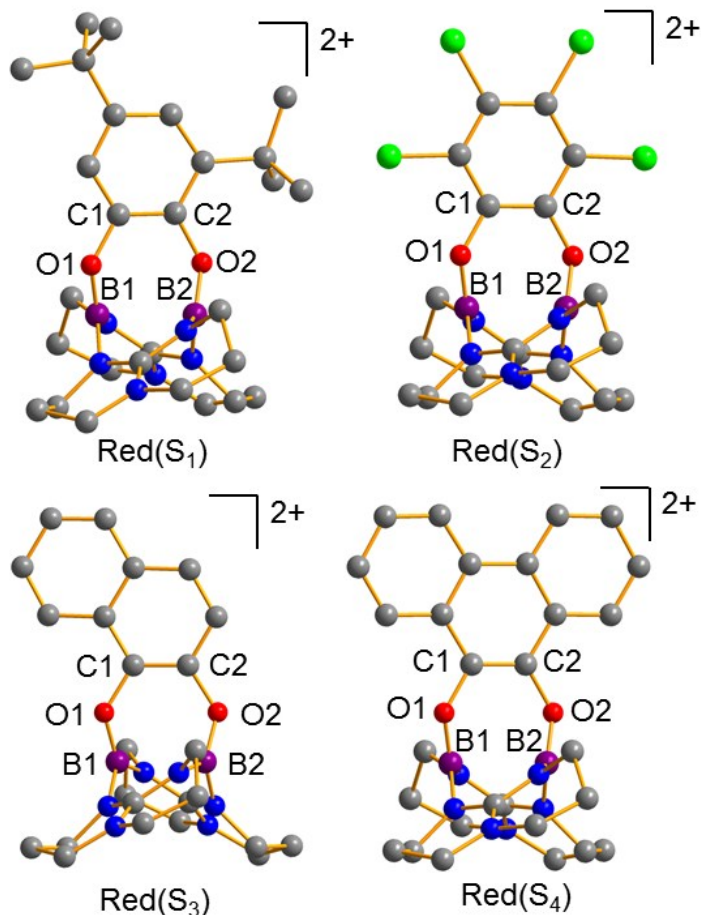

Structural parameters (in Å) for the seven products of complexation and two-electron transfer, **Red(S<sub>1</sub>) – Red(S<sub>7</sub>)**, from B3LYP/def2-TZVP calculations.

| bond    | Red(S <sub>1</sub> ) | Red(S <sub>2</sub> ) | Red(S <sub>3</sub> ) | Red(S <sub>4</sub> ) | Red(S <sub>5</sub> ) | Red(S <sub>6</sub> ) | Red(S <sub>7</sub> ) |
|---------|----------------------|----------------------|----------------------|----------------------|----------------------|----------------------|----------------------|
| B1...B2 | 2.359                | 2.368                | 2.372                | 2.367                | 2.360                | 2.357                | 2.417                |
| B1-O1   | 1.344                | 1.352                | 1.348                | 1.346                | 1.346                | 1.342                | 1.354                |
| B2-O2   | 1.343                | 1.352                | 1.347                | 1.346                | 1.346                | 1.342                | 1.354                |
| O1-C1   | 1.400                | 1.381                | 1.396                | 1.396                | 1.401                | 1.410                | 1.385                |
| O2-C2   | 1.401                | 1.381                | 1.396                | 1.396                | 1.400                | 1.410                | 1.385                |
| C1-C2   | 1.399                | 1.399                | 1.382                | 1.366                | 1.342                | 1.353                | 1.374                |

Calculated energy of the complex between the dication  $\{[B(hpp)]_2\}^{2+}$  and  $S_4$  as a function of the boron-boron distance.

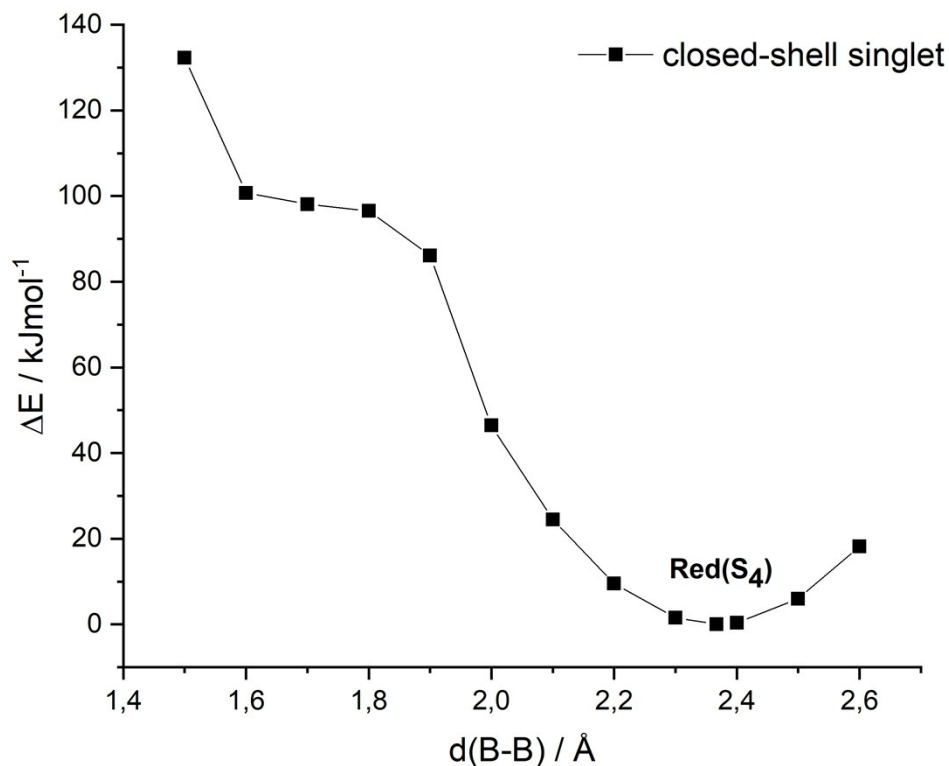

Analogue calculations were carried out for the complex between the dication  $\{[B(hpp)]_2\}^{2+}$  and the substrates  $S_5$  and  $S_6$ . Contrary to the results of the complex between the dication  $\{[B(hpp)]_2\}^{2+}$  and the 9,10-phenanthrene-dione, the calculations found for both substrates two minima with distances between the two boron atoms of 1.658 and 2.360 Å for  $S_5$  and 1.660 and 2.357 Å for  $S_6$ . The calculated structures for the first minima actually comply to the structures **Ox(S<sub>5</sub>)** and **Ox(S<sub>6</sub>)**, and the calculated structures for the second minimum comply again to the structures **Red(S<sub>5</sub>)** and **Red(S<sub>6</sub>)**.

Calculated energy of the complex between the dication  $\{[B(hpp)]_2\}^{2+}$  and 2,2'-dichlorobenzil ( $S_5$ ) as a function of the boron-boron distance.

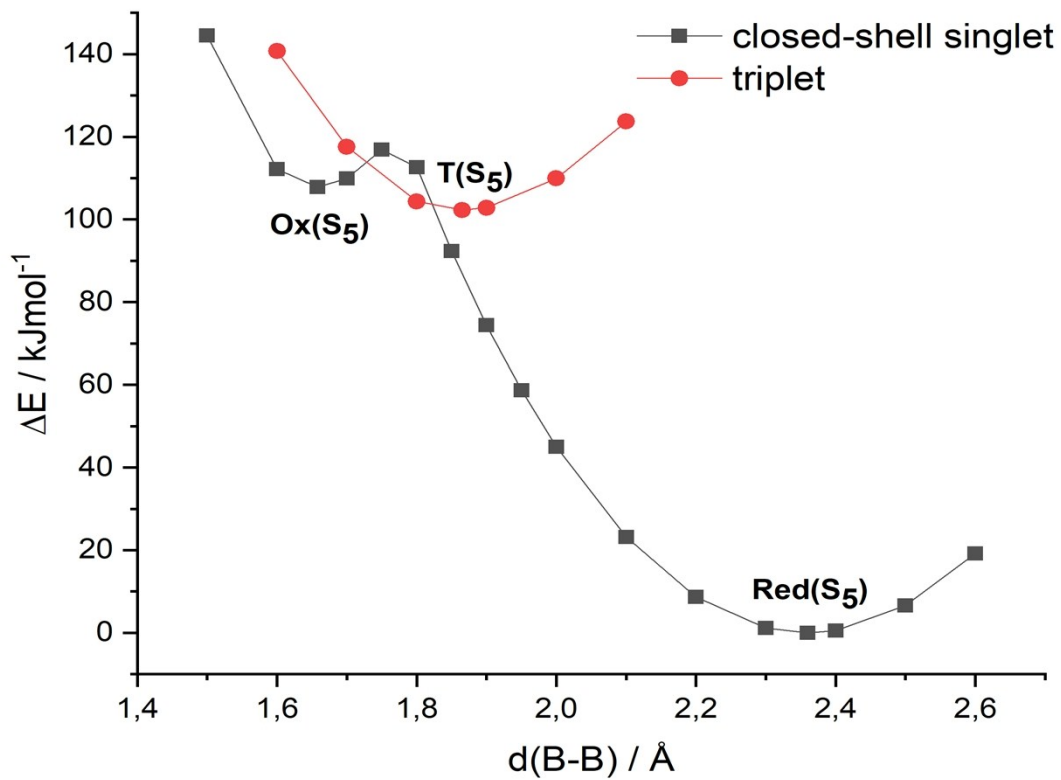

Calculated energy of the complex between the dication  $\{[B(hpp)]_2\}^{2+}$  and benzil ( $S_6$ ) as a function of the boron-boron distance.

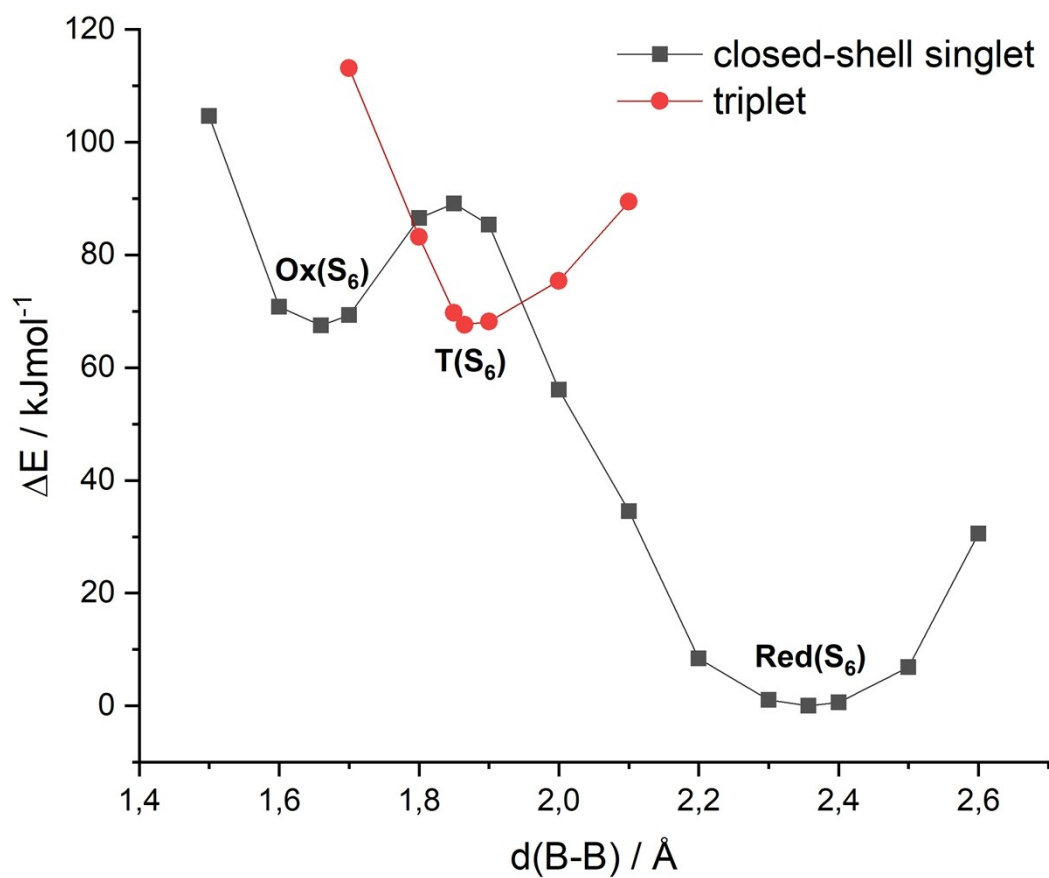

Validation of the calculational method for compounds **Ox(S<sub>7</sub>)** and **Red(S<sub>7</sub>)**.

| Method                    | <b>Ox(S<sub>7</sub>)</b> / Hartree | <b>Red(S<sub>7</sub>)</b> / Hartree | $\Delta E$ / kJ mol <sup>-1</sup> |
|---------------------------|------------------------------------|-------------------------------------|-----------------------------------|
| B3LYP/def2-TZVP           | -1536.817811847                    | -1536.833984858                     | 42.46                             |
| B3LYP-D3/def2-TZVP        | -1536.896880403                    | -1536.917768073                     | 54.84                             |
| DLPNO-CCSD(T)/<br>cc-pVQZ | -1534.925771936                    | -1534.950895172                     | 65.96                             |

In the case of the calculation with DLPNO-CCSD(T)/cc-pVQZ, the energy was calculated at the structure optimized with B3LYP/def2-TZVP.



## Cartesian coordinates and structures for all minima

### A) Calculations on the cations 4-7 with BP86/def2-SVP

#### Cation 4

Illustration of the molecular structure of the cation 4

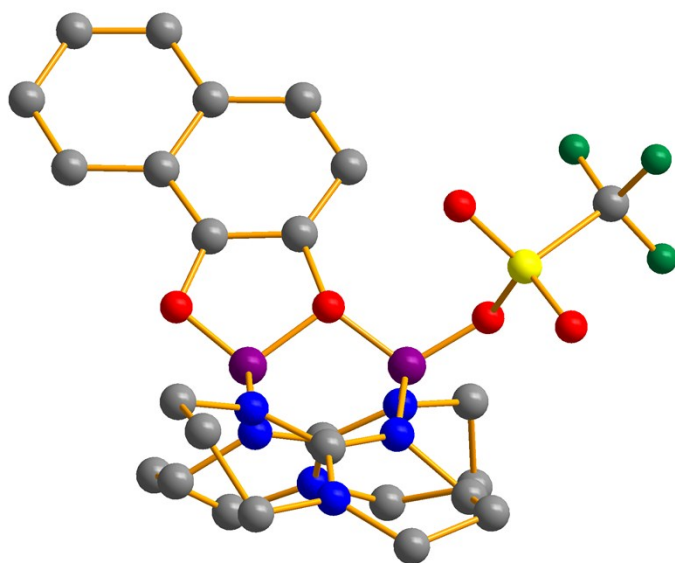

E = -2421.343426 Hartree

Cartesian coordinates (in Å):

|   |           |           |           |
|---|-----------|-----------|-----------|
| S | 0.118177  | 2.162391  | 9.426975  |
| F | 0.106824  | 3.429091  | 7.066529  |
| F | -0.692623 | 4.567610  | 8.749609  |
| F | 1.465399  | 4.287453  | 8.547406  |
| O | 0.425300  | -3.169346 | 7.794448  |
| O | 0.787728  | -0.901116 | 8.329498  |
| O | 1.458772  | 1.439341  | 8.806323  |
| O | -1.090599 | 1.427099  | 9.037474  |
| O | 0.364692  | 2.586143  | 10.813403 |
| N | 0.779747  | -2.507640 | 10.183723 |
| N | 1.818726  | -0.427152 | 10.486243 |
| N | 1.112810  | -1.690963 | 12.370458 |
| N | 2.720671  | -2.485011 | 8.495907  |
| N | 3.151637  | -0.194694 | 8.286697  |
| N | 4.794629  | -1.760903 | 7.615128  |
| C | 1.226430  | -1.537057 | 11.022510 |
| C | -0.117100 | -3.600369 | 10.606142 |
| H | -0.955204 | -3.664385 | 9.881227  |

|   |           |           |           |
|---|-----------|-----------|-----------|
| H | 0.438028  | -4.564281 | 10.540997 |
| C | -0.625262 | -3.384700 | 12.027662 |
| H | -1.421765 | -2.608648 | 12.048013 |
| H | -1.066662 | -4.325676 | 12.417633 |
| C | 0.538997  | -2.934285 | 12.907093 |
| H | 1.322915  | -3.726731 | 12.974015 |
| H | 0.198163  | -2.720544 | 13.940758 |
| C | 1.632735  | -0.727743 | 13.353995 |
| H | 0.866520  | -0.603408 | 14.150588 |
| H | 2.533932  | -1.175224 | 13.837450 |
| C | 1.963303  | 0.616186  | 12.717408 |
| H | 1.043599  | 1.208705  | 12.535445 |
| H | 2.611429  | 1.201517  | 13.403130 |
| C | 2.663816  | 0.392502  | 11.380399 |
| H | 3.653256  | -0.104633 | 11.523051 |
| H | 2.844661  | 1.363653  | 10.881833 |
| C | 3.559866  | -1.484351 | 8.124429  |
| C | 3.234038  | -3.863464 | 8.511166  |
| H | 3.839577  | -4.038194 | 9.432172  |
| H | 2.364636  | -4.549249 | 8.543669  |
| C | 4.073439  | -4.117541 | 7.260571  |
| H | 4.479281  | -5.151015 | 7.253869  |
| H | 3.432056  | -4.002135 | 6.360032  |
| C | 5.225464  | -3.119118 | 7.240962  |
| H | 5.684250  | -3.061951 | 6.227987  |
| H | 6.032495  | -3.435466 | 7.943414  |
| C | 5.804909  | -0.723070 | 7.347252  |
| H | 6.780481  | -1.091113 | 7.738092  |
| H | 5.917536  | -0.621151 | 6.241996  |
| C | 5.436063  | 0.618188  | 7.971775  |
| H | 5.622766  | 0.606682  | 9.068337  |
| H | 6.071416  | 1.416391  | 7.533686  |
| C | 3.957263  | 0.891134  | 7.708287  |
| H | 3.764828  | 0.974101  | 6.612258  |
| H | 3.627655  | 1.841198  | 8.167966  |
| C | 0.132783  | -2.361489 | 6.724992  |
| C | 0.360742  | -1.013070 | 6.975319  |
| C | 0.102034  | 0.013341  | 6.051841  |
| H | 0.254715  | 1.069322  | 6.306283  |
| C | -0.385554 | -0.380594 | 4.805887  |
| H | -0.602790 | 0.385378  | 4.044508  |
| C | -0.629290 | -1.753486 | 4.487678  |
| C | -1.137005 | -2.153566 | 3.213424  |
| H | -1.340319 | -1.377029 | 2.457476  |
| C | -1.377494 | -3.490165 | 2.925196  |
| H | -1.772034 | -3.776460 | 1.936800  |
| C | -1.122343 | -4.497404 | 3.898646  |
| H | -1.322429 | -5.553489 | 3.654908  |
| C | -0.628058 | -4.156338 | 5.150456  |
| H | -0.432958 | -4.928405 | 5.910907  |
| C | -0.371545 | -2.790671 | 5.468589  |
| C | 0.265893  | 3.733517  | 8.359547  |
| B | 1.174791  | -2.349840 | 8.725239  |
| B | 1.806329  | 0.030017  | 8.993345  |

## Cation 5

Illustration of the molecular structure of the cation 5

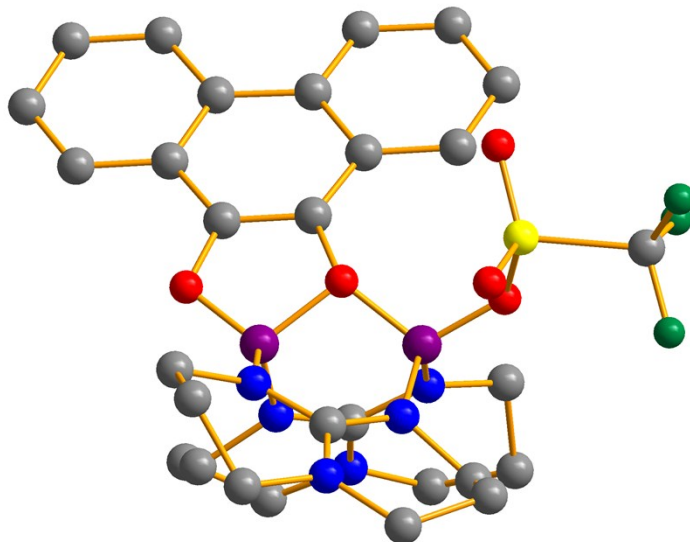

$E = -2574.875108$  Hartree

Cartesian coordinates (in Å):

|   |           |           |           |
|---|-----------|-----------|-----------|
| S | 8.038434  | 11.803123 | 9.286616  |
| F | 6.269212  | 10.620928 | 7.681072  |
| F | 5.876633  | 12.728916 | 8.104068  |
| F | 5.457783  | 11.214251 | 9.622637  |
| O | 12.495633 | 10.233941 | 12.050092 |
| O | 10.327648 | 10.382621 | 11.114501 |
| O | 8.140740  | 10.276441 | 9.911022  |
| O | 8.936483  | 11.970807 | 8.132889  |
| O | 7.990535  | 12.786163 | 10.370182 |
| N | 12.277821 | 10.019915 | 9.599521  |
| N | 10.193307 | 9.337872  | 8.844282  |
| N | 11.931893 | 9.745245  | 7.280522  |
| N | 11.440404 | 8.146949  | 11.174259 |
| N | 9.117145  | 8.256003  | 10.886166 |
| N | 10.085754 | 6.327707  | 11.857925 |
| C | 11.465461 | 9.715197  | 8.556623  |
| C | 13.564843 | 10.724419 | 9.444227  |
| H | 14.387946 | 10.033914 | 9.737736  |
| H | 13.591342 | 11.574700 | 10.157109 |
| C | 13.763623 | 11.199783 | 8.007282  |
| H | 14.827543 | 11.472136 | 7.845046  |
| H | 13.151641 | 12.106267 | 7.805506  |
| C | 13.342193 | 10.089054 | 7.045761  |
| H | 13.430504 | 10.421128 | 5.991116  |
| H | 13.988305 | 9.186105  | 7.164605  |
| C | 11.123263 | 9.376262  | 6.108810  |

|   |           |           |           |
|---|-----------|-----------|-----------|
| H | 11.490207 | 8.394417  | 5.725050  |
| H | 11.310965 | 10.127383 | 5.310340  |
| C | 9.635101  | 9.311438  | 6.438785  |
| H | 9.104560  | 8.751201  | 5.640239  |
| H | 9.205921  | 10.331976 | 6.492189  |
| C | 9.436657  | 8.631095  | 7.792571  |
| H | 8.365870  | 8.644776  | 8.071807  |
| H | 9.757507  | 7.562496  | 7.753649  |
| C | 10.216104 | 7.572875  | 11.317577 |
| C | 12.629390 | 7.321947  | 11.437519 |
| H | 13.496574 | 8.001985  | 11.548393 |
| H | 12.832402 | 6.652146  | 10.568145 |
| C | 12.419918 | 6.500859  | 12.708827 |
| H | 13.304813 | 5.866502  | 12.926665 |
| H | 12.279981 | 7.189667  | 13.569968 |
| C | 11.194668 | 5.613965  | 12.514780 |
| H | 11.448870 | 4.721057  | 11.896056 |
| H | 10.821328 | 5.233081  | 13.492284 |
| C | 8.804664  | 5.601999  | 11.896635 |
| H | 8.444510  | 5.580695  | 12.952300 |
| H | 9.005304  | 4.547001  | 11.602505 |
| C | 7.753834  | 6.231371  | 10.987777 |
| H | 7.963952  | 5.993274  | 9.921546  |
| H | 6.755789  | 5.811379  | 11.233242 |
| C | 7.773574  | 7.744887  | 11.189425 |
| H | 7.057020  | 8.256511  | 10.518792 |
| H | 7.485769  | 8.006298  | 12.234719 |
| C | 11.579051 | 10.593983 | 12.997967 |
| C | 10.276343 | 10.639399 | 12.544520 |
| C | 9.158867  | 10.946631 | 13.388891 |
| C | 7.797012  | 10.956339 | 12.978065 |
| H | 7.548660  | 10.759815 | 11.931347 |
| C | 6.773462  | 11.242639 | 13.877262 |
| H | 5.728740  | 11.253365 | 13.526577 |
| C | 7.073430  | 11.529218 | 15.226399 |
| H | 6.266537  | 11.758588 | 15.940519 |
| C | 8.399034  | 11.526953 | 15.653113 |
| H | 8.607929  | 11.753008 | 16.708574 |
| C | 9.479559  | 11.241958 | 14.774684 |
| C | 10.866228 | 11.240788 | 15.248848 |
| C | 11.232863 | 11.558176 | 16.586746 |
| H | 10.460653 | 11.835259 | 17.318814 |
| C | 12.562722 | 11.536814 | 17.005083 |
| H | 12.806554 | 11.793391 | 18.048706 |
| C | 13.598714 | 11.193811 | 16.103413 |
| H | 14.646830 | 11.182929 | 16.443443 |
| C | 13.285190 | 10.877688 | 14.785216 |
| H | 14.072901 | 10.616482 | 14.062203 |
| C | 11.933322 | 10.900463 | 14.348798 |
| C | 6.269335  | 11.571512 | 8.625615  |
| B | 11.723131 | 9.682491  | 10.964522 |
| B | 9.400168  | 9.576059  | 10.168568 |

## Cation 6

Illustration of the molecular structure of the cation 6

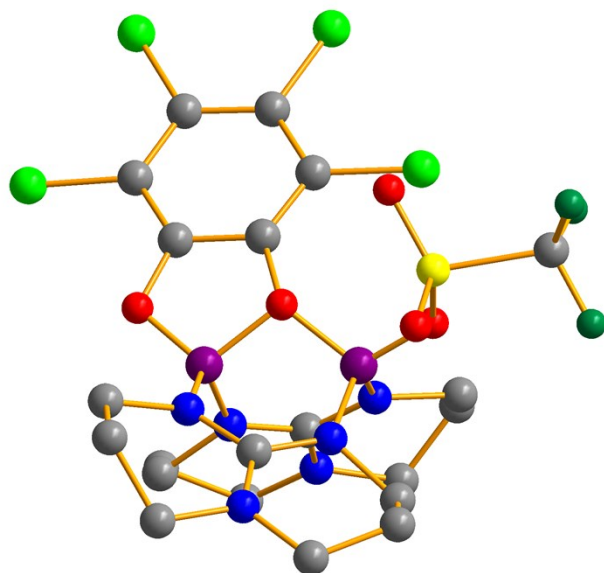

E = -4105.807399 Hartree

Cartesian coordinates (in Å):

|   |           |           |           |
|---|-----------|-----------|-----------|
| C | -1.625149 | -0.813314 | -0.310024 |
| C | -3.803382 | -1.666419 | -1.070933 |
| C | -3.864231 | -0.440262 | -1.976138 |
| C | -2.483076 | -0.191477 | -2.567941 |
| H | -3.579919 | -2.588862 | -1.658279 |
| H | -4.773840 | -1.831760 | -0.559509 |
| H | -4.600091 | -0.598829 | -2.792106 |
| H | -4.201066 | 0.442245  | -1.388824 |
| H | -2.258811 | -0.956391 | -3.347467 |
| H | -2.433523 | 0.799956  | -3.059800 |
| C | -3.083324 | -2.057663 | 1.292263  |
| C | -0.716367 | -1.555363 | 1.831683  |
| C | -2.141827 | -1.542950 | 2.374961  |
| H | -4.138500 | -1.810537 | 1.541966  |
| H | -2.228357 | -2.184891 | 3.276732  |
| H | -3.020800 | -3.168821 | 1.211621  |
| H | -2.412665 | -0.507150 | 2.674060  |
| H | -0.013246 | -1.135901 | 2.578165  |
| N | -0.627343 | -0.727691 | 0.615709  |
| N | -1.433455 | -0.237645 | -1.531864 |
| N | -2.785335 | -1.470817 | -0.025920 |
| H | -0.390258 | -2.598839 | 1.607977  |
| B | 0.577390  | 0.270446  | 0.602713  |

|    |           |           |           |
|----|-----------|-----------|-----------|
| N  | 1.917265  | -0.368192 | 0.339785  |
| C  | 2.037739  | -0.989620 | -0.862483 |
| C  | 3.031375  | -0.237808 | 1.301167  |
| N  | 1.054809  | -0.782935 | -1.776883 |
| N  | 3.087154  | -1.815698 | -1.110575 |
| C  | 4.340200  | -0.741677 | 0.699599  |
| H  | 2.781070  | -0.818318 | 2.217840  |
| H  | 3.111993  | 0.825513  | 1.608552  |
| C  | 0.966661  | -1.721442 | -2.916482 |
| B  | -0.039284 | 0.335394  | -1.797476 |
| C  | 4.079434  | -2.047489 | -0.049574 |
| C  | 3.247837  | -2.574246 | -2.360753 |
| H  | 5.087943  | -0.897304 | 1.505184  |
| H  | 4.762504  | 0.005722  | -0.007626 |
| C  | 2.355084  | -2.032897 | -3.471533 |
| H  | 0.346155  | -1.246672 | -3.700445 |
| H  | 0.445822  | -2.653913 | -2.591967 |
| H  | 3.726910  | -2.847626 | 0.644713  |
| H  | 5.003865  | -2.418166 | -0.537599 |
| H  | 4.317052  | -2.518490 | -2.660735 |
| H  | 3.023595  | -3.647380 | -2.151128 |
| H  | 2.284804  | -2.783089 | -4.287102 |
| H  | 2.781277  | -1.100412 | -3.893064 |
| O  | 0.266480  | 1.269732  | -0.575576 |
| O  | -0.030603 | 1.064856  | -3.050776 |
| S  | 1.255940  | 1.978592  | -3.546420 |
| O  | 2.447250  | 1.137148  | -3.742272 |
| C  | 0.527970  | 2.337190  | -5.269205 |
| F  | 0.388391  | 1.184037  | -5.930253 |
| F  | -0.655263 | 2.939459  | -5.152502 |
| F  | 1.386937  | 3.128439  | -5.904358 |
| O  | 0.581652  | 1.133107  | 1.765599  |
| C  | -0.475284 | 2.298377  | 0.069495  |
| C  | -0.193877 | 2.198570  | 1.448567  |
| C  | -0.698676 | 3.130569  | 2.363909  |
| C  | -1.511918 | 4.182046  | 1.871716  |
| C  | -1.824759 | 4.257868  | 0.492139  |
| C  | -1.312041 | 3.302430  | -0.435722 |
| Cl | -1.785394 | 3.410929  | -2.095076 |
| Cl | -2.856498 | 5.522563  | -0.080826 |
| Cl | -2.140836 | 5.352051  | 2.973948  |
| Cl | -0.324954 | 2.955336  | 4.041750  |
| O  | 1.322570  | 3.226135  | -2.781258 |

## Cation 7

Illustration of the molecular structure of the cation 7

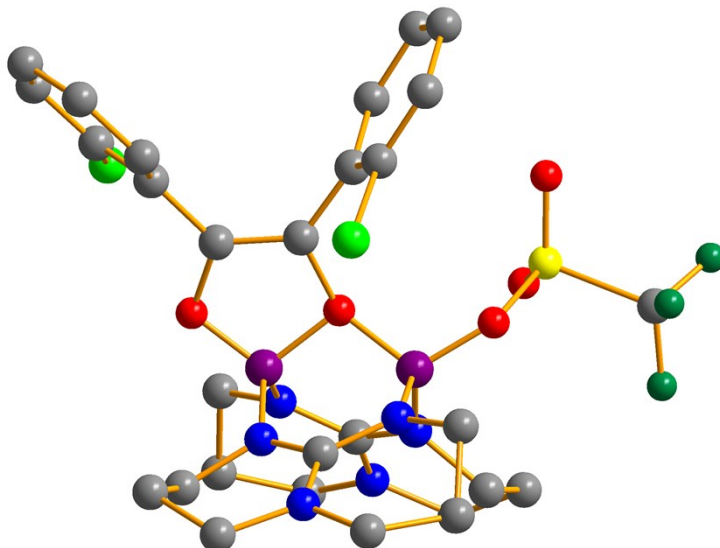

E = -3495.052324 Hartree

Cartesian coordinates (in Å):

|   |          |          |          |
|---|----------|----------|----------|
| S | 5.439819 | 6.977396 | 7.620765 |
| F | 3.793579 | 7.236147 | 9.708074 |
| F | 5.390290 | 5.765718 | 9.956971 |
| F | 3.653951 | 5.293217 | 8.719982 |
| O | 5.129811 | 9.115470 | 2.375345 |
| O | 4.803657 | 8.402814 | 4.591193 |
| O | 6.321187 | 8.003128 | 8.178908 |
| O | 4.160733 | 7.695815 | 6.898712 |
| O | 5.951810 | 5.857738 | 6.813516 |
| N | 4.626295 | 6.723413 | 2.806364 |
| N | 3.612063 | 6.270394 | 4.855643 |
| N | 4.174458 | 4.485752 | 3.396908 |
| N | 2.814574 | 8.537643 | 3.082524 |
| N | 2.450046 | 8.479150 | 5.394723 |
| N | 0.798991 | 9.402190 | 3.969885 |
| B | 4.340915 | 8.178988 | 3.139140 |
| B | 3.768502 | 7.695993 | 5.486145 |
| C | 4.151230 | 5.814771 | 3.691486 |
| C | 5.458139 | 6.289339 | 1.678460 |
| H | 6.493520 | 6.062353 | 2.025731 |
| H | 5.538141 | 7.133312 | 0.966954 |
| C | 4.816969 | 5.055184 | 1.046278 |
| H | 3.822022 | 5.326849 | 0.629669 |
| H | 5.434414 | 4.667815 | 0.208575 |
| C | 4.674543 | 3.967999 | 2.110127 |

|    |           |           |          |
|----|-----------|-----------|----------|
| H  | 3.973162  | 3.172642  | 1.771243 |
| H  | 5.657065  | 3.473440  | 2.295385 |
| C  | 3.751450  | 3.434362  | 4.336653 |
| H  | 4.555459  | 2.665023  | 4.378141 |
| H  | 2.851220  | 2.937047  | 3.903844 |
| C  | 3.454512  | 3.981413  | 5.728905 |
| H  | 4.392898  | 4.131958  | 6.299135 |
| H  | 2.822629  | 3.257036  | 6.284626 |
| C  | 2.749394  | 5.331080  | 5.592523 |
| H  | 1.772648  | 5.217293  | 5.063362 |
| H  | 2.534859  | 5.761465  | 6.587770 |
| C  | 2.020079  | 8.816710  | 4.148033 |
| C  | 2.269359  | 8.722841  | 1.729891 |
| H  | 1.616330  | 7.860152  | 1.454955 |
| H  | 3.120658  | 8.742278  | 1.021432 |
| C  | 1.484071  | 10.030941 | 1.662190 |
| H  | 2.169532  | 10.879134 | 1.877697 |
| H  | 1.058642  | 10.191249 | 0.649191 |
| C  | 0.355854  | 9.968576  | 2.685215 |
| H  | -0.056147 | 10.983781 | 2.885518 |
| H  | -0.488614 | 9.348339  | 2.301114 |
| C  | -0.177599 | 9.562745  | 5.058796 |
| H  | -1.179664 | 9.291913  | 4.655553 |
| H  | -0.222988 | 10.641119 | 5.341540 |
| C  | 0.173616  | 8.707601  | 6.270512 |
| H  | -0.441704 | 9.025556  | 7.138329 |
| H  | -0.055447 | 7.636776  | 6.072616 |
| C  | 1.660329  | 8.873917  | 6.571473 |
| H  | 1.890656  | 9.927752  | 6.849246 |
| H  | 1.978012  | 8.243002  | 7.422225 |
| C  | 5.662477  | 10.018873 | 3.255497 |
| C  | 5.464843  | 9.710945  | 4.567615 |
| C  | 4.492587  | 6.267203  | 9.114461 |
| C  | 6.374537  | 11.194301 | 2.710655 |
| C  | 7.465019  | 11.060141 | 1.814157 |
| C  | 5.969568  | 12.499785 | 3.072472 |
| C  | 8.111901  | 12.188472 | 1.285584 |
| C  | 6.616780  | 13.631104 | 2.554906 |
| H  | 5.121298  | 12.614030 | 3.765931 |
| C  | 7.683955  | 13.473714 | 1.655112 |
| H  | 8.957830  | 12.049997 | 0.595316 |
| H  | 6.281702  | 14.638021 | 2.850401 |
| H  | 8.196154  | 14.355676 | 1.237483 |
| C  | 6.048766  | 10.304632 | 5.782074 |
| C  | 7.386814  | 9.999571  | 6.128055 |
| C  | 5.364070  | 11.247789 | 6.587593 |
| C  | 8.007243  | 10.592453 | 7.235487 |
| H  | 7.938250  | 9.281361  | 5.500906 |
| C  | 5.968092  | 11.840677 | 7.705107 |
| C  | 7.293214  | 11.505081 | 8.027995 |
| H  | 9.049556  | 10.337390 | 7.483052 |
| H  | 5.406406  | 12.572331 | 8.305110 |
| H  | 7.770233  | 11.973744 | 8.904050 |
| Cl | 8.080631  | 9.475151  | 1.387399 |
| Cl | 3.739753  | 11.764165 | 6.147260 |



## B) Calculations with B3LYP/def2-TZVP

### Red(S<sub>1</sub>)

Illustration of the molecular structure (dication)

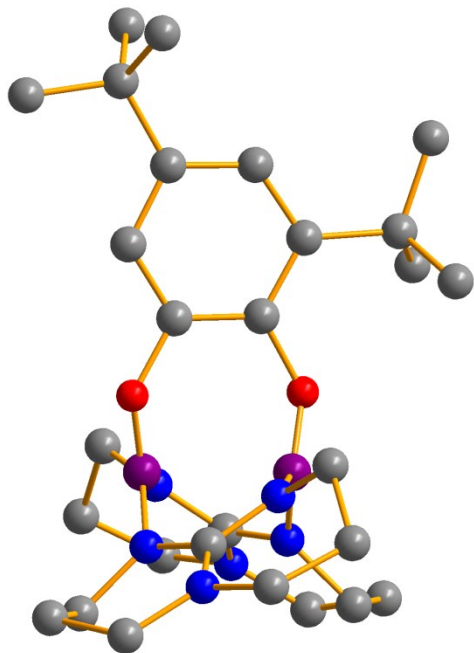

E = -1621.445733 Hartree

Cartesian coordinates (in Å):

|   |           |           |           |
|---|-----------|-----------|-----------|
| N | -1.298123 | -0.782202 | -1.661774 |
| N | -2.038410 | -1.416116 | 0.423710  |
| N | -2.430770 | -2.824352 | -1.416117 |
| N | -2.321778 | 1.266774  | -0.532194 |
| N | -1.415694 | 0.799413  | 1.532878  |
| N | -2.939292 | 2.574331  | 1.318813  |
| B | -1.140222 | 0.568651  | -1.115668 |
| B | -1.001996 | -0.496958 | 0.984707  |
| C | -1.944749 | -1.711112 | -0.895852 |
| C | -0.722254 | -1.242225 | -2.944104 |
| H | 0.137728  | -1.888768 | -2.753873 |
| H | -0.371916 | -0.371968 | -3.494805 |
| C | -1.822603 | -1.978051 | -3.697974 |
| H | -2.627557 | -1.279891 | -3.935165 |
| H | -1.443862 | -2.367848 | -4.643062 |
| C | -2.347343 | -3.138567 | -2.861128 |
| H | -3.341639 | -3.441914 | -3.193185 |
| H | -1.693097 | -4.008953 | -2.953658 |

|   |           |           |           |
|---|-----------|-----------|-----------|
| C | -3.061450 | -3.874312 | -0.585675 |
| H | -2.653096 | -4.834311 | -0.904755 |
| H | -4.128101 | -3.877991 | -0.824382 |
| C | -2.835001 | -3.659850 | 0.904244  |
| H | -1.835570 | -3.991387 | 1.191176  |
| H | -3.552594 | -4.261595 | 1.462319  |
| C | -2.993216 | -2.183339 | 1.247892  |
| H | -4.013790 | -1.839627 | 1.057236  |
| H | -2.769883 | -1.998786 | 2.297177  |
| C | -2.254251 | 1.578280  | 0.785422  |
| C | -3.430830 | 1.825382  | -1.330344 |
| H | -4.357890 | 1.288021  | -1.111998 |
| H | -3.202956 | 1.683121  | -2.385171 |
| C | -3.557444 | 3.305615  | -0.990165 |
| H | -2.650092 | 3.825714  | -1.302254 |
| H | -4.393161 | 3.752277  | -1.529160 |
| C | -3.784100 | 3.476991  | 0.505183  |
| H | -3.564007 | 4.499560  | 0.815152  |
| H | -4.824406 | 3.272276  | 0.770811  |
| C | -2.889662 | 2.902239  | 2.762156  |
| H | -3.917344 | 2.995799  | 3.117346  |
| H | -2.426136 | 3.888560  | 2.841626  |
| C | -2.118120 | 1.876140  | 3.582665  |
| H | -1.801292 | 2.338156  | 4.517940  |
| H | -2.757291 | 1.029523  | 3.840155  |
| C | -0.911629 | 1.377192  | 2.798220  |
| H | -0.209556 | 2.186207  | 2.581454  |
| H | -0.373361 | 0.603249  | 3.339422  |
| O | 0.034373  | 1.209854  | -0.992214 |
| O | 0.269857  | -0.905102 | 0.845586  |
| C | 1.290453  | 0.734926  | -0.597958 |
| C | 1.414272  | -0.222523 | 0.414278  |
| C | 2.399378  | 1.348315  | -1.153075 |
| C | 2.683656  | -0.603200 | 0.879076  |
| C | 3.675056  | 1.009626  | -0.716244 |
| C | 3.772104  | 0.044348  | 0.293225  |
| C | 4.943695  | 1.655671  | -1.290218 |
| C | 2.886577  | -1.694079 | 1.954435  |
| C | 4.624333  | 2.685585  | -2.383970 |
| C | 5.708044  | 2.371695  | -0.155568 |
| C | 5.841063  | 0.558320  | -1.902665 |
| C | 4.370747  | -1.858972 | 2.327261  |
| C | 2.394005  | -3.056773 | 1.416946  |
| C | 2.135172  | -1.330734 | 3.253527  |
| H | 5.553027  | 3.113808  | -2.761981 |
| H | 4.107347  | 2.234559  | -3.234143 |
| H | 4.018502  | 3.512123  | -2.005602 |
| H | 6.612216  | 2.835758  | -0.552713 |
| H | 5.098780  | 3.156773  | 0.297208  |
| H | 6.012248  | 1.682420  | 0.632984  |
| H | 6.746659  | 1.006802  | -2.314205 |
| H | 6.148658  | -0.181462 | -1.162669 |
| H | 5.328089  | 0.034678  | -2.712132 |
| H | 2.946567  | -3.340709 | 0.519335  |
| H | 2.562228  | -3.831068 | 2.167768  |
| H | 1.331487  | -3.048305 | 1.176803  |

|   |          |           |           |
|---|----------|-----------|-----------|
| H | 4.977293 | -2.178648 | 1.478942  |
| H | 4.798173 | -0.941775 | 2.735748  |
| H | 4.459204 | -2.629219 | 3.094001  |
| H | 2.453216 | -0.356218 | 3.630067  |
| H | 1.053969 | -1.318459 | 3.118331  |
| H | 2.355246 | -2.070048 | 4.025268  |
| H | 4.757869 | -0.222743 | 0.636516  |
| H | 2.235043 | 2.097772  | -1.913269 |

### Red(S<sub>3</sub>)

Illustration of the molecular structure (dication)

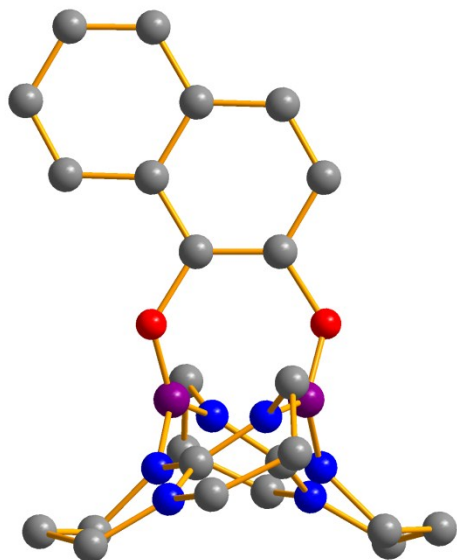

E = -1460.658251 Hartree

Cartesian coordinates (in Å):

|   |           |           |          |
|---|-----------|-----------|----------|
| N | 0.576951  | -1.127390 | 5.045629 |
| N | -0.207033 | -1.749712 | 7.119304 |
| N | -0.599999 | -3.147315 | 5.271781 |
| N | -0.419053 | 0.944411  | 6.164064 |
| N | 0.472800  | 0.450109  | 8.228274 |
| N | -1.008101 | 2.260753  | 8.019340 |
| B | 0.749286  | 0.224218  | 5.579995 |
| B | 0.843901  | -0.858459 | 7.688343 |
| C | -0.101218 | -2.044991 | 5.800418 |
| C | 1.171936  | -1.606472 | 3.777729 |
| H | 2.009919  | -2.274199 | 3.991205 |
| H | 1.557711  | -0.747461 | 3.233286 |

|   |           |           |           |
|---|-----------|-----------|-----------|
| C | 0.070675  | -2.316713 | 3.001000  |
| H | -0.711481 | -1.599671 | 2.744756  |
| H | 0.460949  | -2.717404 | 2.065208  |
| C | -0.500328 | -3.462829 | 3.827590  |
| H | -1.496465 | -3.739472 | 3.478283  |
| H | 0.131868  | -4.350390 | 3.746811  |
| C | -1.261459 | -4.186574 | 6.092776  |
| H | -0.867729 | -5.153442 | 5.776349  |
| H | -2.324820 | -4.168718 | 5.840651  |
| C | -1.048632 | -3.979441 | 7.585735  |
| H | -0.058656 | -4.329301 | 7.883609  |
| H | -1.783241 | -4.569665 | 8.133850  |
| C | -1.185261 | -2.501245 | 7.931478  |
| H | -2.196787 | -2.138383 | 7.729242  |
| H | -0.970391 | -2.322735 | 8.983554  |
| C | -0.347746 | 1.251127  | 7.482632  |
| C | -1.513258 | 1.532248  | 5.365106  |
| H | -2.452297 | 1.014107  | 5.578178  |
| H | -1.285516 | 1.390336  | 4.310205  |
| C | -1.608257 | 3.013304  | 5.712693  |
| H | -0.689611 | 3.515562  | 5.404479  |
| H | -2.433307 | 3.480056  | 5.174299  |
| C | -1.833642 | 3.183763  | 7.208439  |
| H | -1.592979 | 4.200349  | 7.522528  |
| H | -2.878068 | 2.999155  | 7.472459  |
| C | -0.944772 | 2.585638  | 9.463512  |
| H | -1.968496 | 2.702603  | 9.822965  |
| H | -0.458237 | 3.560891  | 9.541140  |
| C | -0.194000 | 1.541506  | 10.281258 |
| H | 0.137642  | 1.996537  | 11.214812 |
| H | -0.852059 | 0.710617  | 10.542190 |
| C | 0.997399  | 1.012980  | 9.492683  |
| H | 1.719872  | 1.803255  | 9.274586  |
| H | 1.516042  | 0.222943  | 10.031052 |
| O | 1.938412  | 0.848850  | 5.686908  |
| O | 2.113702  | -1.291937 | 7.563642  |
| C | 3.167546  | 0.338729  | 6.107927  |
| C | 4.340022  | 0.927191  | 5.573334  |
| C | 3.243612  | -0.610084 | 7.109804  |
| C | 4.305249  | 1.914906  | 4.560554  |
| C | 5.602581  | 0.498927  | 6.089443  |
| C | 4.488600  | -1.025235 | 7.611964  |
| C | 5.473145  | 2.446871  | 4.074649  |
| H | 3.353385  | 2.252657  | 4.174563  |
| C | 5.639652  | -0.477500 | 7.113700  |
| C | 6.721737  | 2.023185  | 4.574973  |
| H | 5.438606  | 3.202218  | 3.300216  |
| H | 7.631272  | 2.455024  | 4.178883  |
| C | 6.783240  | 1.072724  | 5.560613  |
| H | 7.739745  | 0.747798  | 5.950615  |
| H | 6.598578  | -0.797706 | 7.500370  |
| H | 4.509528  | -1.785258 | 8.381440  |

## Red(S<sub>4</sub>)

Illustration of the molecular structure (dication)

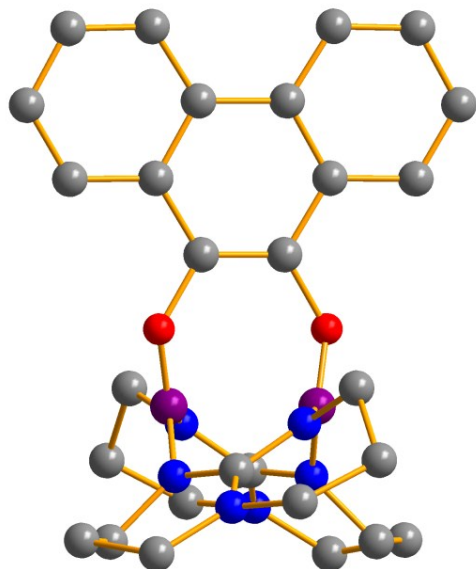

E = -1614.260399 Hartree

Cartesian coordinates (in Å):

|   |           |           |           |
|---|-----------|-----------|-----------|
| N | -1.499399 | -0.839060 | -1.751544 |
| N | -2.146232 | -1.454705 | 0.370854  |
| N | -2.697736 | -2.835626 | -1.448865 |
| N | -2.368531 | 1.245893  | -0.554710 |
| N | -1.345838 | 0.724004  | 1.441272  |
| N | -2.792366 | 2.570857  | 1.339304  |
| B | -1.259161 | 0.504021  | -1.220329 |
| B | -1.039242 | -0.588030 | 0.868471  |
| C | -2.139681 | -1.745926 | -0.953519 |
| C | -1.005574 | -1.322441 | -3.060133 |
| H | -0.166976 | -2.006397 | -2.909459 |
| H | -0.643458 | -0.468002 | -3.627564 |
| C | -2.172563 | -2.008222 | -3.758867 |
| H | -2.956898 | -1.275202 | -3.956580 |
| H | -1.857657 | -2.412204 | -4.721264 |
| C | -2.705746 | -3.146822 | -2.897310 |
| H | -3.729103 | -3.403034 | -3.176513 |
| H | -2.097875 | -4.045784 | -3.025079 |
| C | -3.322786 | -3.863857 | -0.587083 |
| H | -2.971034 | -4.837561 | -0.930879 |
| H | -4.400211 | -3.823960 | -0.766666 |
| C | -3.005993 | -3.665830 | 0.888680  |
| H | -2.006434 | -4.038826 | 1.118804  |

|   |           |           |           |
|---|-----------|-----------|-----------|
| H | -3.715452 | -4.241055 | 1.483878  |
| C | -3.085229 | -2.185836 | 1.244828  |
| H | -4.099569 | -1.799823 | 1.110714  |
| H | -2.797486 | -2.015087 | 2.280618  |
| C | -2.196172 | 1.546762  | 0.756236  |
| C | -3.503639 | 1.860305  | -1.271785 |
| H | -4.436836 | 1.364308  | -0.990845 |
| H | -3.356888 | 1.714594  | -2.340486 |
| C | -3.537857 | 3.342672  | -0.918358 |
| H | -2.632055 | 3.823301  | -1.292143 |
| H | -4.388201 | 3.830140  | -1.395591 |
| C | -3.650417 | 3.515744  | 0.589897  |
| H | -3.362450 | 4.525448  | 0.885913  |
| H | -4.677599 | 3.356927  | 0.928217  |
| C | -2.618533 | 2.890588  | 2.775410  |
| H | -3.610924 | 3.031639  | 3.206969  |
| H | -2.103960 | 3.853526  | 2.818953  |
| C | -1.837002 | 1.826628  | 3.537008  |
| H | -1.428519 | 2.271462  | 4.444637  |
| H | -2.494969 | 1.011477  | 3.843857  |
| C | -0.718464 | 1.271101  | 2.664787  |
| H | 0.005344  | 2.044147  | 2.395516  |
| H | -0.180934 | 0.467956  | 3.163901  |
| O | -0.052152 | 1.098747  | -1.182301 |
| O | 0.207129  | -1.044897 | 0.644905  |
| C | 1.193699  | 0.565309  | -0.848430 |
| C | 1.321256  | -0.383299 | 0.126465  |
| C | 2.336295  | 1.154786  | -1.473400 |
| C | 2.603516  | -0.842240 | 0.561037  |
| C | 3.630954  | 0.726194  | -1.071692 |
| C | 3.766650  | -0.281772 | -0.034036 |
| C | 2.723810  | -1.830969 | 1.558996  |
| C | 5.017322  | -0.746319 | 0.419045  |
| C | 4.739048  | 1.316989  | -1.710666 |
| C | 2.193686  | 2.142352  | -2.469572 |
| C | 5.117516  | -1.708402 | 1.399338  |
| C | 3.963851  | -2.257705 | 1.973898  |
| H | 1.831887  | -2.258869 | 1.994940  |
| H | 4.048919  | -3.017059 | 2.740104  |
| H | 6.093786  | -2.042961 | 1.724554  |
| H | 5.926195  | -0.346286 | -0.005012 |
| H | 5.740271  | 1.019408  | -1.437006 |
| H | 1.204306  | 2.469531  | -2.757276 |
| C | 3.301338  | 2.694743  | -3.069474 |
| C | 4.582270  | 2.275800  | -2.686733 |
| H | 5.454688  | 2.709164  | -3.157802 |
| H | 3.184705  | 3.452320  | -3.833288 |

## Red(S<sub>2</sub>)

Illustration of the molecular structure (dication)

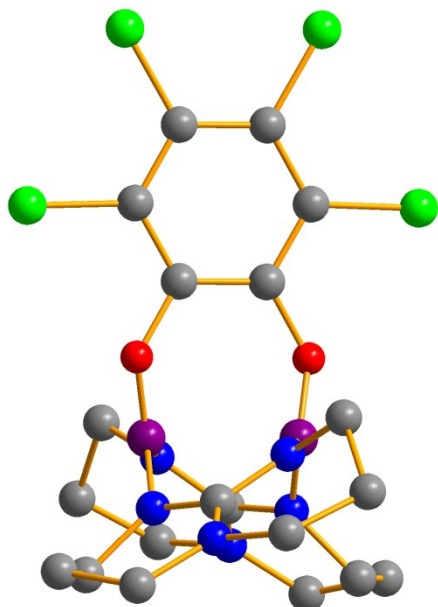

E = -3145.273467 Hartree

Cartesian coordinates (in Å):

|   |           |           |           |
|---|-----------|-----------|-----------|
| N | -1.708019 | -1.005470 | -1.756534 |
| N | -2.256741 | -1.438550 | 0.438452  |
| N | -3.012072 | -2.891260 | -1.246952 |
| N | -2.358946 | 1.211747  | -0.661215 |
| N | -1.263454 | 0.750357  | 1.311971  |
| N | -2.590605 | 2.681980  | 1.157122  |
| B | -1.352333 | 0.346312  | -1.332766 |
| B | -1.079409 | -0.610973 | 0.815415  |
| C | -2.355171 | -1.814580 | -0.861390 |
| C | -1.340388 | -1.600346 | -3.062689 |
| H | -0.541324 | -2.332598 | -2.923909 |
| H | -0.964395 | -0.808589 | -3.706956 |
| C | -2.596685 | -2.243551 | -3.635591 |
| H | -3.343580 | -1.471037 | -3.827499 |
| H | -2.377392 | -2.724603 | -4.589025 |
| C | -3.139447 | -3.289323 | -2.669186 |
| H | -4.193860 | -3.492422 | -2.863129 |
| H | -2.599882 | -4.233310 | -2.776257 |
| C | -3.641102 | -3.820810 | -0.280316 |
| H | -3.373961 | -4.834725 | -0.581004 |

|    |           |           |           |
|----|-----------|-----------|-----------|
| H  | -4.723268 | -3.719993 | -0.394958 |
| C  | -3.213409 | -3.552648 | 1.155634  |
| H  | -2.225464 | -3.975130 | 1.346985  |
| H  | -3.915045 | -4.041750 | 1.831602  |
| C  | -3.178893 | -2.051664 | 1.418115  |
| H  | -4.173481 | -1.607931 | 1.322466  |
| H  | -2.810879 | -1.836970 | 2.419746  |
| C  | -2.096525 | 1.585201  | 0.616498  |
| C  | -3.487121 | 1.859636  | -1.363590 |
| H  | -4.434929 | 1.449919  | -1.004199 |
| H  | -3.406534 | 1.636325  | -2.425888 |
| C  | -3.399226 | 3.359933  | -1.109469 |
| H  | -2.483725 | 3.748841  | -1.558560 |
| H  | -4.238015 | 3.875578  | -1.577429 |
| C  | -3.420767 | 3.637028  | 0.387098  |
| H  | -3.048308 | 4.639780  | 0.600784  |
| H  | -4.436497 | 3.573651  | 0.785344  |
| C  | -2.323588 | 3.077486  | 2.560628  |
| H  | -3.281642 | 3.314783  | 3.025948  |
| H  | -1.743745 | 4.002478  | 2.516794  |
| C  | -1.579442 | 2.009790  | 3.353412  |
| H  | -1.098827 | 2.479048  | 4.212080  |
| H  | -2.274318 | 1.262213  | 3.740405  |
| C  | -0.542613 | 1.326758  | 2.470880  |
| H  | 0.215241  | 2.032049  | 2.121447  |
| H  | -0.036196 | 0.520046  | 2.996334  |
| O  | -0.101695 | 0.854647  | -1.411512 |
| O  | 0.129199  | -1.162119 | 0.562321  |
| C  | 1.113737  | 0.268785  | -1.119004 |
| C  | 1.243372  | -0.614902 | -0.042038 |
| C  | 2.241724  | 0.687705  | -1.820794 |
| C  | 2.502008  | -1.072843 | 0.340641  |
| C  | 3.510073  | 0.225599  | -1.446138 |
| C  | 3.641547  | -0.650313 | -0.356110 |
| Cl | 2.611372  | -2.161843 | 1.668155  |
| Cl | 2.033607  | 1.778839  | -3.134678 |
| Cl | 4.893786  | 0.741065  | -2.313086 |
| Cl | 5.187050  | -1.214023 | 0.118892  |



## Ox(S<sub>5</sub>)

Illustration of the molecular structure (dication)

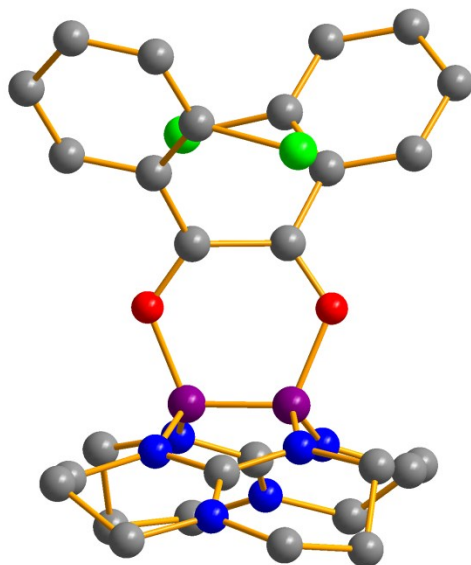

E = -2534.506124 Hartree

Cartesian coordinates (in Å):

|   |           |           |           |
|---|-----------|-----------|-----------|
| N | -1.424238 | -1.737795 | -1.275914 |
| N | -1.662480 | -1.768686 | 1.012094  |
| N | -2.060768 | -3.746796 | -0.213512 |
| N | -2.110718 | 0.832274  | 1.049041  |
| N | -3.476698 | 2.405950  | -0.141251 |
| B | -1.173039 | -0.301231 | -0.903112 |
| B | -1.274962 | -0.331103 | 0.751445  |
| C | -1.719233 | -2.458895 | -0.160691 |
| C | -1.447216 | -2.370374 | -2.598428 |
| H | -0.455967 | -2.767003 | -2.843642 |
| H | -1.679251 | -1.604401 | -3.338325 |
| C | -2.482472 | -3.484584 | -2.634017 |
| H | -3.485545 | -3.060339 | -2.545825 |
| H | -2.434366 | -4.019407 | -3.582760 |
| C | -2.228672 | -4.454903 | -1.493632 |
| H | -3.069826 | -5.139950 | -1.377845 |
| H | -1.337239 | -5.061084 | -1.683122 |
| C | -2.321172 | -4.535119 | 1.002361  |
| H | -1.919947 | -5.535673 | 0.833419  |
| H | -3.403225 | -4.635078 | 1.133827  |
| C | -1.679734 | -3.899734 | 2.223491  |
| H | -0.594899 | -4.024121 | 2.182316  |

|    |           |           |           |
|----|-----------|-----------|-----------|
| H  | -2.033971 | -4.404259 | 3.122675  |
| C  | -2.025371 | -2.418945 | 2.273558  |
| H  | -3.094821 | -2.286398 | 2.471945  |
| H  | -1.480158 | -1.925119 | 3.078344  |
| C  | -2.606668 | 1.395761  | -0.114308 |
| C  | -2.559903 | 1.296242  | -2.565576 |
| H  | -3.432316 | 0.718740  | -2.891292 |
| H  | -1.759216 | 1.110631  | -3.282019 |
| C  | -2.899751 | 2.778339  | -2.515371 |
| H  | -1.990627 | 3.359595  | -2.343264 |
| H  | -3.322907 | 3.104629  | -3.465669 |
| C  | -3.899545 | 3.037765  | -1.402092 |
| H  | -3.996120 | 4.108077  | -1.213116 |
| H  | -4.892258 | 2.662508  | -1.669898 |
| C  | -4.092412 | 2.934799  | 1.087346  |
| H  | -5.125598 | 3.191048  | 0.848382  |
| H  | -3.582675 | 3.861555  | 1.369042  |
| C  | -4.040551 | 1.918111  | 2.214353  |
| H  | -4.347638 | 2.393453  | 3.146141  |
| H  | -4.741005 | 1.103806  | 2.013863  |
| C  | -2.629206 | 1.364035  | 2.339913  |
| H  | -1.946998 | 2.143719  | 2.695939  |
| H  | -2.596809 | 0.552058  | 3.066242  |
| O  | 0.298000  | 0.227324  | -1.409017 |
| O  | 0.204550  | -0.182075 | 1.450816  |
| C  | 1.208120  | 0.565866  | -0.623477 |
| C  | 1.260758  | -0.065946 | 0.794568  |
| C  | 2.505535  | -0.545467 | 1.373206  |
| C  | 2.654579  | -0.452986 | 2.773927  |
| C  | 3.545857  | -1.144531 | 0.632452  |
| C  | 3.816909  | -0.860990 | 3.392172  |
| H  | 1.855695  | -0.008420 | 3.350718  |
| C  | 4.709560  | -1.564988 | 1.256542  |
| C  | 4.851005  | -1.406129 | 2.629627  |
| H  | 3.928932  | -0.751031 | 4.462250  |
| H  | 5.486277  | -2.039482 | 0.672817  |
| H  | 5.766904  | -1.728481 | 3.108081  |
| C  | 2.179973  | 1.556785  | -1.056836 |
| C  | 2.753799  | 2.528438  | -0.210312 |
| C  | 2.526896  | 1.578584  | -2.425046 |
| C  | 3.684562  | 3.432330  | -0.697242 |
| C  | 3.460904  | 2.470744  | -2.906008 |
| H  | 2.080890  | 0.846237  | -3.083295 |
| C  | 4.049904  | 3.390601  | -2.037154 |
| H  | 4.097514  | 4.181198  | -0.035549 |
| H  | 3.741120  | 2.451521  | -3.950428 |
| H  | 4.784446  | 4.094149  | -2.407519 |
| Cl | 3.343529  | -1.532966 | -1.049427 |
| Cl | 2.196042  | 2.740928  | 1.421933  |

## Red(S<sub>5</sub>)

Illustration of the molecular structure (dication)

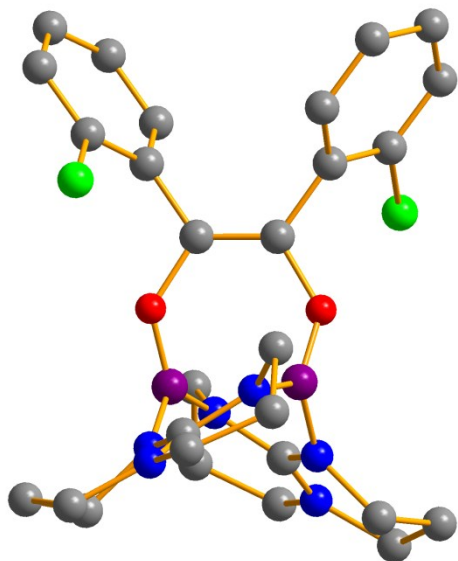

E = -2534.547206 Hartree

Cartesian coordinates (in Å):

|   |           |           |           |
|---|-----------|-----------|-----------|
| N | -1.164666 | -0.629996 | -1.867027 |
| N | -1.977765 | -1.534314 | 0.088575  |
| N | -2.209158 | -2.732205 | 1.919074  |
| N | -2.312766 | 1.237007  | -0.554733 |
| N | -1.491476 | 0.549144  | 1.484024  |
| N | -3.045784 | 2.307294  | 1.403896  |
| B | -1.083462 | 0.650028  | -1.159108 |
| B | -1.009657 | -0.656095 | 0.804622  |
| C | -1.803808 | -1.668346 | -1.249554 |
| C | -0.498184 | -0.919790 | -3.155472 |
| H | 0.374764  | -1.553930 | -2.983645 |
| H | -0.155052 | 0.019682  | -3.583082 |
| C | -1.523147 | -1.603357 | -4.051406 |
| H | -2.343768 | -0.912740 | -4.254482 |
| H | -1.077335 | -1.866638 | -5.010844 |
| C | -2.040521 | -2.871863 | -3.383672 |
| H | -3.003181 | -3.170197 | -3.802367 |
| H | -1.346165 | -3.701155 | -3.538949 |
| C | -2.821001 | -3.901160 | -1.248535 |
| H | -2.345922 | -4.796146 | -1.652807 |
| H | -3.873231 | -3.928412 | -1.543229 |
| C | -2.677356 | -3.851619 | 0.266013  |

|    |           |           |           |
|----|-----------|-----------|-----------|
| H  | -1.675640 | -4.164245 | 0.565804  |
| H  | -3.386870 | -4.548467 | 0.712620  |
| C  | -2.932163 | -2.434546 | 0.765861  |
| H  | -3.957971 | -2.118216 | 0.557297  |
| H  | -2.772066 | -2.362240 | 1.840070  |
| C  | -2.313641 | 1.393948  | 0.792143  |
| C  | -3.395273 | 1.868177  | -1.335672 |
| H  | -4.319547 | 1.293962  | -1.226660 |
| H  | -3.115436 | 1.854287  | -2.387514 |
| C  | -3.567949 | 3.296104  | -0.831439 |
| H  | -2.656941 | 3.861901  | -1.033764 |
| H  | -4.385751 | 3.790892  | -1.355698 |
| C  | -3.869910 | 3.286397  | 0.660470  |
| H  | -3.686024 | 4.268472  | 1.098455  |
| H  | -4.917088 | 3.035765  | 0.848251  |
| C  | -3.065825 | 2.466738  | 2.876056  |
| H  | -4.109655 | 2.498767  | 3.193026  |
| H  | -2.630217 | 3.446093  | 3.088485  |
| C  | -2.305082 | 1.368160  | 3.608809  |
| H  | -2.040356 | 1.726211  | 4.603954  |
| H  | -2.933670 | 0.485308  | 3.739044  |
| C  | -1.054162 | 0.986207  | 2.828014  |
| H  | -0.363602 | 1.827767  | 2.734557  |
| H  | -0.522429 | 0.163070  | 3.300277  |
| O  | 0.064630  | 1.304669  | -0.905922 |
| O  | 0.288578  | -0.986491 | 0.676520  |
| C  | 1.313118  | 0.827385  | -0.487560 |
| C  | 1.405506  | -0.197515 | 0.374528  |
| C  | 2.653431  | -0.673870 | 1.003378  |
| C  | 3.304745  | 0.118627  | 1.954045  |
| C  | 3.205866  | -1.924435 | 0.698578  |
| C  | 4.459788  | -0.322650 | 2.583850  |
| H  | 2.896816  | 1.092648  | 2.192369  |
| C  | 4.358086  | -2.375879 | 1.324443  |
| C  | 4.982104  | -1.572057 | 2.271488  |
| H  | 4.949866  | 0.306155  | 3.315024  |
| H  | 4.766991  | -3.342135 | 1.063343  |
| H  | 5.881989  | -1.925245 | 2.757779  |
| C  | 2.450050  | 1.617951  | -0.999538 |
| C  | 2.629445  | 2.964498  | -0.657822 |
| C  | 3.371023  | 1.033431  | -1.874877 |
| C  | 3.680143  | 3.706414  | -1.176246 |
| C  | 4.427361  | 1.766333  | -2.396890 |
| H  | 3.252876  | -0.009529 | -2.139787 |
| C  | 4.577420  | 3.103802  | -2.050417 |
| H  | 3.799078  | 4.741832  | -0.888515 |
| H  | 5.130282  | 1.295292  | -3.070835 |
| H  | 5.397659  | 3.683760  | -2.452754 |
| Cl | 2.481850  | -2.938968 | -0.531808 |
| Cl | 1.554385  | 3.741160  | 0.485985  |

**T(S<sub>5</sub>)**

Illustration of the molecular structure (dication)

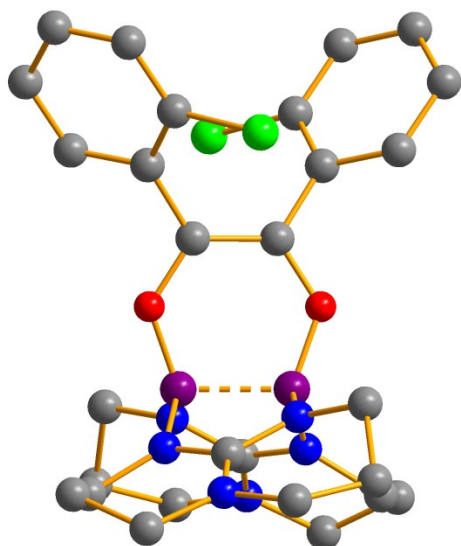

E = -2534.508254 Hartree

Cartesian coordinates (in Å):

|   |           |           |           |
|---|-----------|-----------|-----------|
| N | -1.281353 | -0.844731 | -1.808533 |
| N | -1.764826 | -1.608265 | 0.280247  |
| N | -2.272751 | -2.968558 | -1.574697 |
| N | -2.122906 | 1.358017  | -0.687263 |
| N | -1.609640 | 0.727133  | 1.438267  |
| N | -3.098525 | 2.523111  | 1.112728  |
| B | -1.004829 | 0.392374  | -1.014662 |
| B | -0.963834 | -0.387784 | 0.678424  |
| C | -1.792404 | -1.848415 | -1.049029 |
| C | -0.992309 | -1.094135 | -3.227904 |
| H | -0.043221 | -1.628517 | -3.333112 |
| H | -0.888092 | -0.134214 | -3.730740 |
| C | -2.138698 | -1.905328 | -3.820211 |
| H | -3.053798 | -1.309537 | -3.801713 |
| H | -1.930884 | -2.152063 | -4.861653 |
| C | -2.329960 | -3.192509 | -3.032173 |
| H | -3.298295 | -3.641994 | -3.258481 |
| H | -1.560837 | -3.926131 | -3.289938 |
| C | -2.756955 | -4.077219 | -0.730786 |
| H | -2.412567 | -5.008124 | -1.183899 |
| H | -3.850174 | -4.081507 | -0.765335 |
| C | -2.253820 | -3.960234 | 0.699283  |
| H | -1.197270 | -4.230908 | 0.751614  |

|    |           |           |           |
|----|-----------|-----------|-----------|
| H  | -2.803384 | -4.658155 | 1.331348  |
| C  | -2.436673 | -2.534173 | 1.204683  |
| H  | -3.498581 | -2.282947 | 1.286966  |
| H  | -1.989279 | -2.416249 | 2.190712  |
| C  | -2.307550 | 1.570723  | 0.634173  |
| C  | -2.943763 | 2.085901  | -1.666806 |
| H  | -3.895312 | 1.568474  | -1.822421 |
| H  | -2.411441 | 2.096707  | -2.617010 |
| C  | -3.173920 | 3.506009  | -1.163951 |
| H  | -2.222757 | 4.041938  | -1.142893 |
| H  | -3.838693 | 4.043197  | -1.840806 |
| C  | -3.791810 | 3.475580  | 0.225078  |
| H  | -3.734362 | 4.459866  | 0.692308  |
| H  | -4.848248 | 3.195673  | 0.180915  |
| C  | -3.316160 | 2.711662  | 2.560083  |
| H  | -4.381529 | 2.892543  | 2.712101  |
| H  | -2.784144 | 3.617449  | 2.864733  |
| C  | -2.854650 | 1.511228  | 3.372783  |
| H  | -2.792873 | 1.794447  | 4.423811  |
| H  | -3.580347 | 0.698916  | 3.295093  |
| C  | -1.497836 | 1.030163  | 2.872162  |
| H  | -0.729702 | 1.791351  | 3.039828  |
| H  | -1.184738 | 0.125562  | 3.390675  |
| O  | 0.278220  | 1.041108  | -1.241358 |
| O  | 0.423963  | -0.681748 | 1.003781  |
| C  | 1.405143  | 0.825504  | -0.588209 |
| C  | 1.499882  | -0.170297 | 0.434732  |
| C  | 2.762799  | -0.725166 | 0.923556  |
| C  | 2.971942  | -0.800595 | 2.312174  |
| C  | 3.747298  | -1.269464 | 0.078340  |
| C  | 4.143358  | -1.315728 | 2.832006  |
| H  | 2.213072  | -0.408197 | 2.974952  |
| C  | 4.923104  | -1.791627 | 0.597929  |
| C  | 5.127043  | -1.799136 | 1.971438  |
| H  | 4.297156  | -1.337061 | 3.902408  |
| H  | 5.658932  | -2.214706 | -0.071771 |
| H  | 6.048440  | -2.203951 | 2.369364  |
| C  | 2.510357  | 1.698189  | -0.986572 |
| C  | 3.250278  | 2.473982  | -0.075253 |
| C  | 2.796135  | 1.840058  | -2.356201 |
| C  | 4.282588  | 3.292717  | -0.510132 |
| C  | 3.826140  | 2.650806  | -2.791582 |
| H  | 2.219586  | 1.268188  | -3.070137 |
| C  | 4.580027  | 3.367638  | -1.864403 |
| H  | 4.828347  | 3.887969  | 0.208738  |
| H  | 4.049052  | 2.722605  | -3.847525 |
| H  | 5.389380  | 4.004992  | -2.195945 |
| Cl | 3.471628  | -1.449109 | -1.633103 |
| Cl | 2.809013  | 2.557591  | 1.608719  |

## Ox(S<sub>6</sub>)

Illustration of the molecular structure (dication)

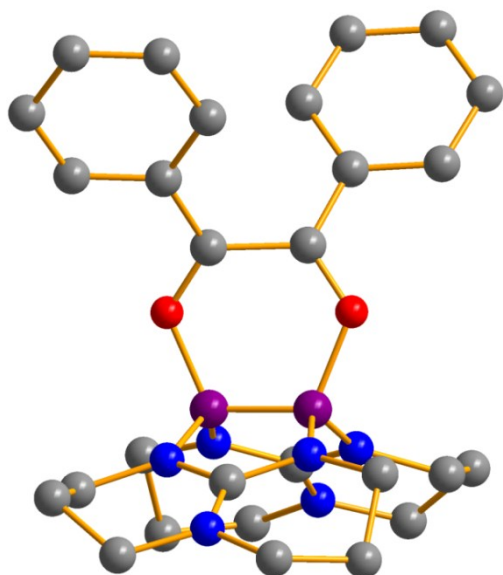

E = -1615.400468 Hartree

Cartesian coordinates (in Å):

|   |           |           |           |
|---|-----------|-----------|-----------|
| N | -1.062313 | -1.892243 | -0.912250 |
| N | -1.289377 | -1.462854 | 1.334749  |
| N | -1.695338 | -3.646573 | 0.533630  |
| N | -1.778355 | 0.619226  | -1.400535 |
| N | -1.826726 | 1.093143  | 0.848571  |
| N | -3.178252 | 2.352830  | -0.619629 |
| B | -0.812723 | -0.405416 | -0.839879 |
| B | -0.907582 | -0.101843 | 0.788883  |
| C | -1.352747 | -2.373656 | 0.325114  |
| C | -1.089030 | -2.777687 | -2.080315 |
| H | -0.098744 | -3.216562 | -2.244788 |
| H | -1.323117 | -2.176121 | -2.958505 |
| C | -2.124559 | -3.875818 | -1.888715 |
| H | -3.127254 | -3.441622 | -1.884376 |
| H | -2.079458 | -4.590379 | -2.710814 |
| C | 1.867463  | -4.597173 | -0.577209 |
| H | -2.708400 | -5.244518 | -0.323882 |
| H | -0.976930 | -5.230163 | -0.644332 |
| C | -1.953310 | -4.174121 | 1.883187  |
| H | -1.551669 | -5.188083 | 1.919112  |
| H | -3.035085 | -4.246232 | 2.034271  |

|   |           |           |           |
|---|-----------|-----------|-----------|
| C | -1.311200 | -3.305690 | 2.950905  |
| H | -0.226398 | -3.436786 | 2.935243  |
| H | -1.665734 | -3.618031 | 3.933445  |
| C | -1.655714 | -1.845115 | 2.699874  |
| H | -2.725632 | -1.675633 | 2.865856  |
| H | -1.113169 | -1.198718 | 3.390385  |
| C | -2.283012 | 1.388353  | -0.397324 |
| C | -2.252118 | 0.792450  | -2.775094 |
| H | -3.113651 | 0.141757  | -2.963088 |
| H | -1.455179 | 0.479856  | -3.450527 |
| C | -2.627891 | 2.245246  | -3.026287 |
| H | -1.732003 | 2.869934  | -2.988116 |
| H | -3.066400 | 2.360143  | -4.017825 |
| C | -3.624987 | 2.704946  | -1.977038 |
| H | -3.745598 | 3.788984  | -2.009623 |
| H | -4.610611 | 2.261763  | -2.151497 |
| C | -3.799925 | 3.105597  | 0.482313  |
| H | -4.840911 | 3.283134  | 0.208138  |
| H | -3.312792 | 4.082411  | 0.564353  |
| C | -3.715182 | 2.341637  | 1.792170  |
| H | -4.027657 | 2.989929  | 2.611047  |
| H | -4.396414 | 1.487619  | 1.769849  |
| C | -2.289609 | 1.857196  | 2.010775  |
| H | -1.624759 | 2.708762  | 2.192581  |
| H | -2.231651 | 1.212276  | 2.887558  |
| O | 0.636373  | 0.005274  | -1.448066 |
| O | 0.553823  | 0.212856  | 1.430384  |
| C | 1.551196  | 0.512802  | -0.751959 |
| C | 1.614027  | 0.188103  | 0.756592  |
| C | 2.854304  | -0.190007 | 1.386969  |
| C | 2.913956  | -0.238756 | 2.799027  |
| C | 3.977240  | -0.604079 | 0.635555  |
| C | 4.065768  | -0.658627 | 3.429775  |
| H | 2.057378  | 0.077578  | 3.377192  |
| C | 5.114461  | -1.055423 | 1.279594  |
| H | 3.950697  | -0.602181 | -0.444419 |
| C | 5.165791  | -1.071908 | 2.672112  |
| H | 4.118542  | -0.670572 | 4.510258  |
| H | 5.964454  | -1.391725 | 0.701322  |
| H | 6.065210  | -1.408754 | 3.172004  |
| C | 2.488635  | 1.425297  | -1.357795 |
| C | 3.277745  | 2.306714  | -0.584718 |
| C | 2.548478  | 1.504127  | -2.768530 |
| C | 4.091713  | 3.235395  | -1.206638 |
| H | 3.232359  | 2.286782  | 0.494458  |
| C | 3.389566  | 2.411613  | -3.376673 |
| H | 1.946872  | 0.831443  | -3.363192 |
| C | 4.158815  | 3.281446  | -2.597822 |
| H | 4.678397  | 3.922658  | -0.612124 |
| H | 3.453549  | 2.452679  | -4.455835 |
| H | 4.811680  | 3.998008  | -3.080135 |



## Red(S<sub>6</sub>)

Illustration of the molecular structure (dication)

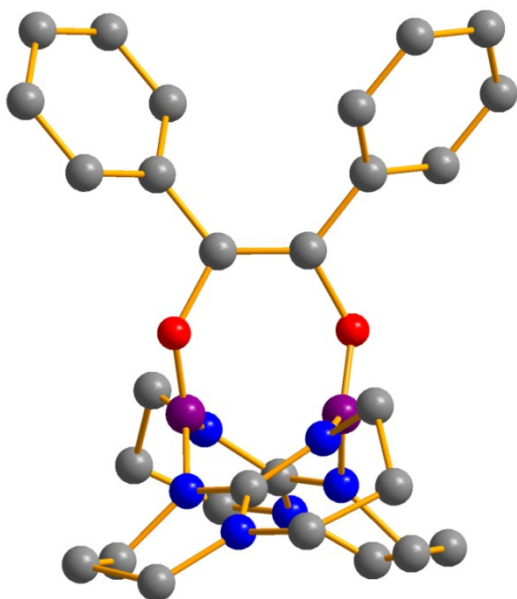

E = -1615.426159 Hartree

Cartesian coordinates (in Å):

|   |           |           |           |
|---|-----------|-----------|-----------|
| N | -1.121999 | -0.543521 | -1.909420 |
| N | -1.928832 | -1.542535 | 0.002572  |
| N | -2.181803 | -2.632205 | -2.064043 |
| N | -2.262267 | 1.261297  | -0.505366 |
| N | -1.461801 | 0.470874  | 1.504580  |
| N | -3.028140 | 2.219151  | 1.499187  |
| B | -1.031689 | 0.698561  | -1.134295 |
| B | -0.966099 | -0.695054 | 0.765199  |
| C | -1.762887 | -1.607107 | -1.342230 |
| C | -0.475871 | -0.760553 | -3.222067 |
| H | 0.400066  | -1.402817 | -3.102490 |
| H | -0.136128 | 0.200859  | -3.600721 |
| C | -1.513697 | -1.393024 | -4.140191 |
| H | -2.335503 | -0.691285 | -4.294461 |
| H | -1.081070 | -1.604289 | -5.118317 |
| C | -2.025410 | -2.694882 | -3.535523 |
| H | -2.992045 | -2.970266 | -3.960759 |
| H | -1.333404 | -3.515243 | -3.741297 |
| C | -2.808238 | -3.825719 | -1.453788 |
| H | -2.346088 | -4.705545 | -1.903906 |
| H | -3.860992 | -3.824136 | -1.748012 |

|   |           |           |           |
|---|-----------|-----------|-----------|
| C | -2.664545 | -3.855660 | 0.061339  |
| H | -1.668651 | -4.200328 | 0.345285  |
| H | -3.385254 | -4.562922 | 0.472219  |
| C | -2.895998 | -2.462198 | 0.633549  |
| H | -3.917477 | -2.120803 | 0.443458  |
| H | -2.734131 | -2.448272 | 1.709805  |
| C | -2.279606 | 1.345220  | 0.848474  |
| C | -3.348839 | 1.915104  | -1.261212 |
| H | -4.265453 | 1.322901  | -1.188768 |
| H | -3.061808 | 1.959088  | -2.310290 |
| C | -3.548403 | 3.312808  | -0.687302 |
| H | -2.646078 | 3.903234  | -0.855774 |
| H | -4.370684 | 3.820209  | -1.192156 |
| C | -3.859477 | 3.223987  | 0.800191  |
| H | -3.692777 | 4.185204  | 1.288589  |
| H | -4.904688 | 2.950797  | 0.966717  |
| C | -3.069913 | 2.296526  | 2.977684  |
| H | -4.118482 | 2.310187  | 3.279991  |
| H | -2.639219 | 3.262674  | 3.252045  |
| C | -2.319821 | 1.158479  | 3.659245  |
| H | -2.075087 | 1.457759  | 4.678597  |
| H | -2.948436 | 0.268487  | 3.725354  |
| C | -1.053457 | 0.825011  | 2.881366  |
| H | -0.361906 | 1.670664  | 2.857043  |
| H | -0.527968 | -0.024098 | 3.312806  |
| O | 0.116660  | 1.327617  | -0.839756 |
| O | 0.331286  | -1.006547 | 0.620299  |
| C | 1.383355  | 0.821106  | -0.485152 |
| C | 1.459822  | -0.188072 | 0.412483  |
| C | 2.638657  | -0.638602 | 1.164852  |
| C | 3.512700  | 0.287284  | 1.748312  |
| C | 2.877048  | -2.007217 | 1.349809  |
| C | 4.607422  | -0.146957 | 2.481159  |
| H | 3.333464  | 1.347497  | 1.629303  |
| C | 3.975186  | -2.436047 | 2.081978  |
| H | 2.208478  | -2.736000 | 0.910520  |
| C | 4.844330  | -1.508228 | 2.647174  |
| H | 5.273971  | 0.578238  | 2.929488  |
| H | 4.155638  | -3.495533 | 2.209599  |
| H | 5.699823  | -1.844268 | 3.218459  |
| C | 2.489540  | 1.569517  | -1.097485 |
| C | 2.391778  | 2.956671  | -1.271851 |
| C | 3.633568  | 0.906556  | -1.559273 |
| C | 3.423514  | 3.663192  | -1.873657 |
| H | 1.512249  | 3.483712  | -0.925766 |
| C | 4.660759  | 1.617446  | -2.162242 |
| H | 3.717407  | -0.166255 | -1.447521 |
| C | 4.561156  | 2.996786  | -2.317941 |
| H | 3.342057  | 4.735710  | -1.993759 |
| H | 5.538498  | 1.093498  | -2.517584 |
| H | 5.364528  | 3.549104  | -2.787728 |

## T(S<sub>6</sub>)

Illustration of the molecular structure (dication)

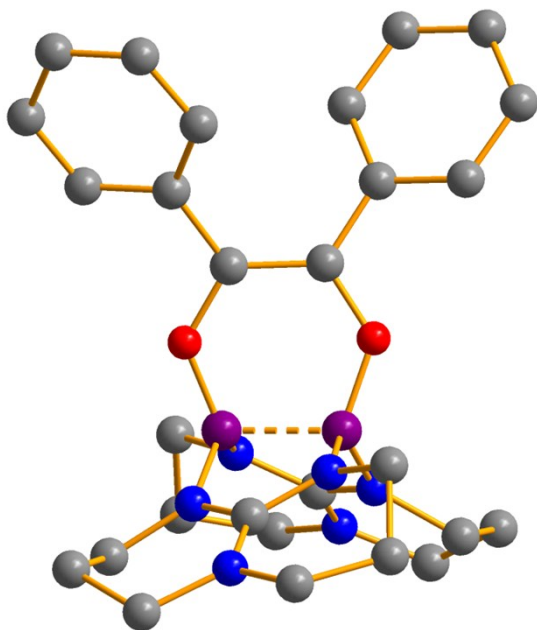

E = -1615.400412 Hartree

Cartesian coordinates (in Å):

|   |           |           |           |
|---|-----------|-----------|-----------|
| N | -1.252216 | -0.905866 | -1.776050 |
| N | -1.715519 | -1.613330 | 0.336042  |
| N | -2.225598 | -3.029800 | -1.475793 |
| N | -2.116025 | 1.317619  | -0.719599 |
| N | -1.594386 | 0.755717  | 1.422371  |
| N | -3.117416 | 2.512901  | 1.046134  |
| B | -0.980234 | 0.359422  | -1.020081 |
| B | -0.924618 | -0.370717 | 0.694863  |
| C | -1.749768 | -1.890615 | -0.985012 |
| C | -0.980970 | -1.188586 | -3.192097 |
| H | -0.028248 | -1.716350 | -3.299910 |
| H | -0.892941 | -0.240905 | -3.720679 |
| C | -2.126587 | -2.025378 | -3.749117 |
| H | -3.047123 | -1.437893 | -3.733629 |
| H | -1.929848 | -2.296920 | -4.786539 |
| C | -2.295380 | -3.293288 | -2.925554 |
| H | -3.261109 | -3.758709 | -3.129905 |
| H | -1.521370 | -4.025432 | -3.173248 |
| C | -2.695246 | -4.117656 | -0.598063 |
| H | -2.346597 | -5.058608 | -1.026661 |

|   |           |           |           |
|---|-----------|-----------|-----------|
| H | -3.788693 | -4.131898 | -0.624509 |
| C | -2.183931 | -3.956234 | 0.824748  |
| H | -1.124901 | -4.217116 | 0.877491  |
| H | -2.723883 | -4.640126 | 1.480036  |
| C | -2.374313 | -2.517540 | 1.289791  |
| H | -3.437886 | -2.272850 | 1.372140  |
| H | -1.922419 | -2.368355 | 2.269590  |
| C | -2.306360 | 1.562469  | 0.594619  |
| C | -2.948959 | 2.002361  | -1.718830 |
| H | -3.890547 | 1.463237  | -1.861819 |
| H | -2.415873 | 1.997364  | -2.668728 |
| C | -3.207680 | 3.431198  | -1.256269 |
| H | -2.266942 | 3.985671  | -1.248444 |
| H | -3.881379 | 3.936802  | -1.948476 |
| C | -3.827271 | 3.426897  | 0.132314  |
| H | -3.790039 | 4.424765  | 0.572165  |
| H | -4.878192 | 3.125841  | 0.093840  |
| C | -3.344743 | 2.733725  | 2.486892  |
| H | -4.413645 | 2.900674  | 2.630211  |
| H | -2.829355 | 3.655304  | 2.772587  |
| C | -2.867746 | 1.561096  | 3.330546  |
| H | -2.818344 | 1.869488  | 4.375134  |
| H | -3.578429 | 0.734396  | 3.266664  |
| C | -1.499590 | 1.092866  | 2.849243  |
| H | -0.746487 | 1.871092  | 3.008079  |
| H | -1.174419 | 0.206063  | 3.390666  |
| O | 0.287992  | 1.010159  | -1.262715 |
| O | 0.460843  | -0.629507 | 1.017786  |
| C | 1.437430  | 0.830373  | -0.620684 |
| C | 1.545156  | -0.116915 | 0.445837  |
| C | 2.796960  | -0.649179 | 0.958017  |
| C | 2.864585  | -1.068531 | 2.302017  |
| C | 3.919004  | -0.850034 | 0.127665  |
| C | 4.025085  | -1.625715 | 2.804932  |
| H | 2.008744  | -0.930002 | 2.947587  |
| C | 5.067430  | -1.432408 | 0.633504  |
| H | 3.876265  | -0.583000 | -0.918138 |
| C | 5.130007  | -1.810618 | 1.972927  |
| H | 4.075860  | -1.919695 | 3.844992  |
| H | 5.915373  | -1.599833 | -0.017264 |
| H | 6.034674  | -2.254955 | 2.367460  |
| C | 2.508535  | 1.709545  | -1.059335 |
| C | 3.469596  | 2.221105  | -0.162973 |
| C | 2.533229  | 2.143829  | -2.400077 |
| C | 4.425752  | 3.119709  | -0.601439 |
| H | 3.443428  | 1.941480  | 0.880068  |
| C | 3.508654  | 3.021155  | -2.834863 |
| H | 1.796825  | 1.767576  | -3.096182 |
| C | 4.457188  | 3.513424  | -1.937486 |
| H | 5.145348  | 3.521796  | 0.099303  |
| H | 3.535770  | 3.326872  | -3.872427 |
| H | 5.214092  | 4.207776  | -2.278765 |

## Ox(S<sub>7</sub>)

Illustration of the molecular structure (dication)

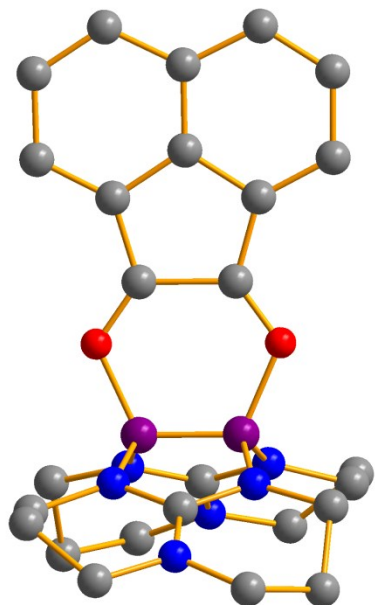

E = -1536.817812 Hartree

Cartesian coordinates (in Å):

|   |           |           |           |
|---|-----------|-----------|-----------|
| N | -0.999208 | -1.446298 | -1.518422 |
| N | -1.001483 | -1.929946 | 0.729855  |
| N | -1.388578 | -3.666390 | -0.821207 |
| N | -1.776961 | 1.041247  | -1.005527 |
| N | -1.842417 | 0.538110  | 1.237535  |
| N | -3.301882 | 2.184916  | 0.386359  |
| B | -0.773870 | -0.083861 | -0.903803 |
| B | -0.801782 | -0.432531 | 0.728041  |
| C | -1.130560 | -2.387186 | -0.545585 |
| C | -1.092522 | -1.821967 | -2.932961 |
| H | -0.102220 | -2.082999 | -3.322025 |
| H | -1.439556 | -0.954182 | -3.493504 |
| C | -2.048692 | -2.992418 | -3.105330 |
| H | -3.066139 | -2.677983 | -2.860766 |
| H | -2.050267 | -3.334111 | -4.140556 |
| C | -1.626602 | -4.133944 | -2.197138 |
| H | -2.405503 | -4.896410 | -2.150632 |
| H | -0.717855 | -4.617776 | -2.568935 |
| C | -1.479424 | -4.690648 | 0.232848  |
| H | -1.017557 | -5.599593 | -0.156057 |
| H | -2.535086 | -4.914076 | 0.416438  |

|   |           |           |           |
|---|-----------|-----------|-----------|
| C | -0.787758 | -4.241279 | 1.508065  |
| H | 0.296423  | -4.263025 | 1.373347  |
| H | -1.031732 | -4.932546 | 2.314991  |
| C | -1.232643 | -2.830360 | 1.862510  |
| H | -2.292554 | -2.827684 | 2.141065  |
| H | -0.669329 | -2.453392 | 2.716594  |
| C | -2.331341 | 1.286671  | 0.212991  |
| C | -2.299878 | 1.707960  | -2.200989 |
| H | -3.118138 | 1.123061  | -2.636142 |
| H | -1.500868 | 1.753417  | -2.941494 |
| C | -2.784650 | 3.106454  | -1.849705 |
| H | -1.935581 | 3.727402  | -1.553826 |
| H | -3.249707 | 3.578028  | -2.715621 |
| C | -3.792365 | 3.028875  | -0.716102 |
| H | -3.986675 | 4.020816  | -0.304917 |
| H | -4.748531 | 2.628395  | -1.067367 |
| C | -3.966264 | 2.372462  | 1.687074  |
| H | -5.021207 | 2.566446  | 1.487671  |
| H | -3.555568 | 3.265238  | 2.169160  |
| C | -3.805116 | 1.149827  | 2.573222  |
| H | -4.155090 | 1.382261  | 3.579167  |
| H | -4.418581 | 0.329779  | 2.192327  |
| C | -2.343583 | 0.729012  | 2.602519  |
| H | -1.743960 | 1.482678  | 3.124582  |
| H | -2.222855 | -0.209125 | 3.143823  |
| O | 0.663902  | 0.479721  | -1.446171 |
| O | 0.603355  | -0.116012 | 1.506547  |
| C | 1.612652  | 0.634458  | -0.663396 |
| C | 1.579832  | 0.325750  | 0.883646  |
| C | 3.640071  | 1.112930  | 0.279652  |
| C | 4.971699  | 1.524985  | 0.390068  |
| C | 2.879037  | 0.653988  | 1.388088  |
| C | 3.562857  | 1.542052  | -2.107024 |
| C | 5.593673  | 1.955623  | -0.811547 |
| C | 5.538973  | 1.462092  | 1.690237  |
| C | 3.459342  | 0.603384  | 2.644778  |
| C | 4.902593  | 1.959650  | -2.013930 |
| H | 3.049621  | 1.556015  | -3.059584 |
| H | 6.625098  | 2.286492  | -0.790269 |
| C | 4.798124  | 1.014499  | 2.773780  |
| H | 6.567295  | 1.768690  | 1.839714  |
| H | 2.906268  | 0.259170  | 3.508847  |
| H | 5.409443  | 2.294453  | -2.909020 |
| H | 5.264193  | 0.979774  | 3.749346  |
| C | 2.929885  | 1.116359  | -0.950831 |

## Red(S<sub>7</sub>)

Illustration of the molecular structure (dication)

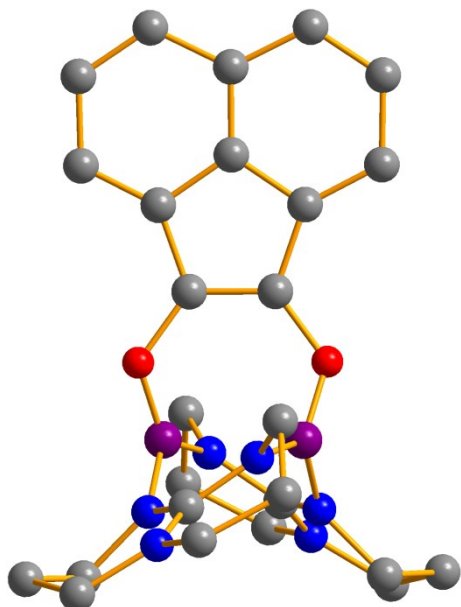

E = -1536.833985 Hartree

Cartesian coordinates (in Å):

|   |           |           |           |
|---|-----------|-----------|-----------|
| N | -1.200219 | -0.525636 | -1.916270 |
| N | -1.992008 | -1.565435 | -0.020466 |
| N | -2.236431 | -2.625943 | -2.102560 |
| N | -2.410728 | 1.235617  | -0.513881 |
| N | -1.465010 | 0.465397  | 1.439280  |
| N | -3.098929 | 2.150656  | 1.537642  |
| B | -1.176373 | 0.740061  | -1.187545 |
| B | -1.011853 | -0.726180 | 0.726338  |
| C | -1.833872 | -1.608147 | -1.364490 |
| C | -0.517864 | -0.744354 | -3.212291 |
| H | 0.349059  | -1.392948 | -3.067341 |
| H | -0.162089 | 0.215775  | -3.578519 |
| C | -1.537253 | -1.366143 | -4.158331 |
| H | -2.350475 | -0.658271 | -4.329060 |
| H | -1.082096 | -1.574476 | -5.126864 |
| C | -2.071224 | -2.669105 | -3.574421 |
| H | -3.037481 | -2.928030 | -4.010671 |
| H | -1.387106 | -3.494951 | -3.783696 |
| C | -2.842893 | -3.838074 | -1.507085 |
| H | -2.379117 | -4.703093 | -1.983005 |
| H | -3.900145 | -3.840613 | -1.784390 |

|   |           |           |           |
|---|-----------|-----------|-----------|
| C | -2.671970 | -3.897583 | 0.004269  |
| H | -1.664317 | -4.227953 | 0.262580  |
| H | -3.370929 | -4.628332 | 0.411556  |
| C | -2.922351 | -2.522455 | 0.612041  |
| H | -3.954993 | -2.200236 | 0.452165  |
| H | -2.736169 | -2.527334 | 1.684464  |
| C | -2.360032 | 1.310436  | 0.837010  |
| C | -3.544288 | 1.872499  | -1.214529 |
| H | -4.438933 | 1.251044  | -1.118807 |
| H | -3.299397 | 1.944759  | -2.272723 |
| C | -3.762118 | 3.252457  | -0.605136 |
| H | -2.887409 | 3.875198  | -0.800696 |
| H | -4.621722 | 3.741294  | -1.063984 |
| C | -4.004431 | 3.128125  | 0.892486  |
| H | -3.856487 | 4.087995  | 1.389057  |
| H | -5.028342 | 2.807241  | 1.100682  |
| C | -3.050287 | 2.226219  | 3.016735  |
| H | -4.075601 | 2.174440  | 3.386855  |
| H | -2.664704 | 3.218649  | 3.262072  |
| C | -2.184344 | 1.141088  | 3.646564  |
| H | -1.877233 | 1.468064  | 4.640259  |
| H | -2.753310 | 0.217975  | 3.771623  |
| C | -0.965795 | 0.868033  | 2.774055  |
| H | -0.329610 | 1.750857  | 2.678517  |
| H | -0.359118 | 0.057815  | 3.171773  |
| O | -0.046048 | 1.456883  | -0.981438 |
| O | 0.293387  | -1.064697 | 0.600530  |
| C | 1.157764  | 0.916362  | -0.561157 |
| C | 1.301073  | -0.180046 | 0.254389  |
| C | 3.367837  | 0.701052  | -0.081662 |
| C | 4.743021  | 0.915159  | -0.035625 |
| C | 2.708116  | -0.360972 | 0.575127  |
| C | 2.951816  | 2.606080  | -1.482743 |
| C | 5.225416  | 2.039641  | -0.758607 |
| C | 5.495772  | -0.017060 | 0.728672  |
| C | 3.459333  | -1.254667 | 1.308199  |
| C | 4.347354  | 2.849092  | -1.452719 |
| H | 2.306245  | 3.272468  | -2.041369 |
| H | 6.284841  | 2.264082  | -0.765945 |
| C | 4.861565  | -1.062047 | 1.371948  |
| H | 6.570479  | 0.090682  | 0.807466  |
| H | 3.011633  | -2.091615 | 1.829696  |
| H | 4.733869  | 3.701645  | -1.995473 |
| H | 5.452410  | -1.762650 | 1.947177  |
| C | 2.461223  | 1.519239  | -0.791009 |



**T(S<sub>7</sub>)**

Illustration of the molecular structure (dication)

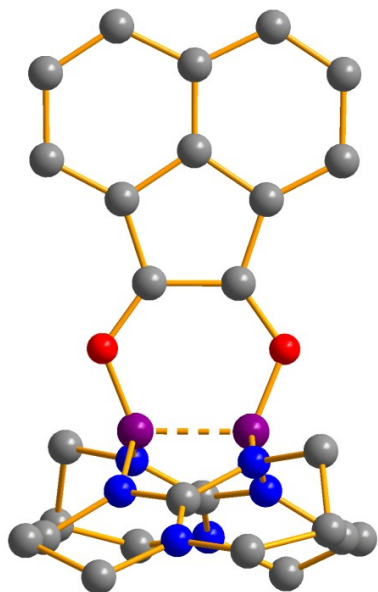

E = -1536.818060 Hartree

Cartesian coordinates (in Å):

|   |           |           |           |
|---|-----------|-----------|-----------|
| N | -1.359602 | -0.551880 | -1.969691 |
| N | -1.737076 | -1.663758 | -0.019237 |
| N | -2.314007 | -2.702916 | -2.052505 |
| N | -2.188396 | 1.422094  | -0.480560 |
| N | -1.604370 | 0.454359  | 1.495772  |
| N | -3.151027 | 2.229994  | 1.511273  |
| B | -1.065756 | 0.554755  | -1.004662 |
| B | -0.947831 | -0.509068 | 0.556000  |
| C | -1.823208 | -1.677321 | -1.366857 |
| C | -1.124475 | -0.562101 | -3.421087 |
| H | -0.177624 | -1.061139 | -3.649259 |
| H | -1.042595 | 0.468026  | -3.762691 |
| C | -2.288814 | -1.279218 | -4.093756 |
| H | -3.206397 | -0.707292 | -3.940288 |
| H | -2.122638 | -1.347209 | -5.169142 |
| C | -2.437578 | -2.681523 | -3.523126 |
| H | -3.412897 | -3.099681 | -3.777735 |
| H | -1.677399 | -3.352364 | -3.933413 |
| C | -2.747259 | -3.946279 | -1.387625 |
| H | -2.412209 | -4.781517 | -2.004575 |
| H | -3.840802 | -3.965637 | -1.377307 |

|   |           |           |           |
|---|-----------|-----------|-----------|
| C | -2.183756 | -4.060778 | 0.019882  |
| H | -1.123092 | -4.317667 | -0.017184 |
| H | -2.697717 | -4.864087 | 0.548207  |
| C | -2.359920 | -2.742389 | 0.763432  |
| H | -3.420019 | -2.527042 | 0.928696  |
| H | -1.872723 | -2.782366 | 1.736784  |
| C | -2.345474 | 1.398998  | 0.860447  |
| C | -3.057185 | 2.277861  | -1.303340 |
| H | -3.997478 | 1.763050  | -1.523272 |
| H | -2.552001 | 2.467038  | -2.249641 |
| C | -3.314574 | 3.583764  | -0.561392 |
| H | -2.379269 | 4.139794  | -0.469892 |
| H | -4.012571 | 4.205653  | -1.122330 |
| C | -3.893660 | 3.297379  | 0.814981  |
| H | -3.851250 | 4.188909  | 1.442591  |
| H | -4.942715 | 2.995655  | 0.746354  |
| C | -3.340742 | 2.161161  | 2.973339  |
| H | -4.407873 | 2.272816  | 3.172497  |
| H | -2.833610 | 3.021936  | 3.418387  |
| C | -2.817793 | 0.859410  | 3.561671  |
| H | -2.736358 | 0.964024  | 4.643866  |
| H | -3.517745 | 0.044807  | 3.363794  |
| C | -1.460244 | 0.520855  | 2.957546  |
| H | -0.714821 | 1.273493  | 3.232218  |
| H | -1.098435 | -0.442913 | 3.310779  |
| O | 0.191494  | 1.261454  | -1.245044 |
| O | 0.447517  | -0.816628 | 0.866839  |
| C | 1.312143  | 0.885495  | -0.679063 |
| C | 1.436127  | -0.123546 | 0.357125  |
| C | 3.502687  | 0.700503  | -0.104602 |
| C | 4.882320  | 0.907372  | -0.068328 |
| C | 2.823252  | -0.243117 | 0.709418  |
| C | 3.137932  | 2.365901  | -1.813740 |
| C | 5.385364  | 1.894889  | -0.955079 |
| C | 5.606357  | 0.103765  | 0.850790  |
| C | 3.554554  | -1.011780 | 1.596382  |
| C | 4.529761  | 2.592684  | -1.793224 |
| H | 2.506938  | 2.934834  | -2.484073 |
| H | 6.447151  | 2.107269  | -0.978683 |
| C | 4.950875  | -0.820479 | 1.649318  |
| H | 6.681104  | 0.211681  | 0.930572  |
| H | 3.084284  | -1.745753 | 2.237762  |
| H | 4.942751  | 3.340101  | -2.457539 |
| H | 5.530100  | -1.418979 | 2.339802  |
| C | 2.619380  | 1.409690  | -0.959869 |
